1 **Igf signalling uncouples retina growth from body size by modulating progenitor cell**  
2 **division**

3  
4 Clara Becker<sup>1,2</sup>, Katharina Lust<sup>1,3</sup>, Joachim Wittbrodt<sup>1\*</sup>

5  
6 <sup>1</sup> Centre for Organismal Studies, Heidelberg University, Heidelberg, Germany

7 <sup>2</sup> Heidelberg Biosciences International Graduate School, Heidelberg, Germany

8 <sup>3</sup> Present address: Research Institute of Molecular Pathology (IMP), Vienna BioCenter (VBC),  
9 Vienna, Austria

10 \* Corresponding author: [jochen.wittbrodt@cos.uni-heidelberg.de](mailto:jochen.wittbrodt@cos.uni-heidelberg.de)

11  
12  
13  
14  
15  
16  
17  
18  
19  
20  
21

22 **Abstract**

23  
24  
25  
26  
27  
28  
29  
30  
31  
32  
33  
34

Balancing the relative growth of body and organs is of key importance for coordinating size and function. This is of particular relevance in post-embryonically growing organisms, facing this challenge life-long. We addressed this question in the neuroretina of medaka fish (*Oryzias latipes*), where growth and size regulation are crucial for functional homeostasis of the visual system. We find that a central growth regulator, Igf1 receptor, is necessary and sufficient for proliferation control in the postembryonic retinal stem cell niche, the ciliary marginal zone (CMZ). Targeted activation of Igf1r signalling in the CMZ uncouples neuroretina growth from body size control, increasing layer thickness while preserving the structural integrity of the retina. The retinal expansion is driven exclusively by enhanced proliferation of progenitor cells while stem cells do not respond to Igf1r modulation. Our findings position Igf signalling as key module controlling retinal size and structure with far reaching evolutionary implications.

## 1 Introduction

2  
3 During embryonic development and postembryonic life of multicellular organisms, the  
4 proportions of overall body and organ size are actively controlled, increased or decreased as  
5 necessary to sustain appropriate species-specific proportions. Scaling of overall body and organ  
6 size is known to be regulated by systemic signals, which couple nutritional status to growth  
7 (Andersen, Colombani, & Léopold, 2013). Conversely, differential growth of organs can be  
8 the result of altered sensitivity to systemic signalling (H. Y. Tang, Smith-Caldas, Driscoll,  
9 Salhadar, & Shingleton, 2011) as well as of variant intrinsic signalling in the respective organ  
10 (Bosch, Ziukaite, Alexandre, Basler, & Vincent, 2017; Twitty & Schwind, 1931).

11 To study organ size scaling, teleost fish such as medaka (*Oryzias latipes*) and zebrafish (*Danio*  
12 *rerio*) are particularly interesting model systems. They display life-long postembryonic growth  
13 and each organ harbours distinct stem cell populations, which continuously self-renew,  
14 generate progenitor and ultimately differentiated cells (Aghaallaei et al., 2016; Centanin et al.,  
15 2014; Furlan et al., 2017). In the eye and the retina precise regulation of continuous growth is  
16 of utmost importance to ensure the functional homeostasis of optical parameters and therefore  
17 vision. Differential eye size in teleost fish has been shown to be of functional relevance, since  
18 visual acuity is notably correlated with eye size (Caves, Sutton, & Johnsen, 2017). How retinal  
19 growth is regulated and uncoupled from body growth in different fish species to achieve  
20 differential eye sizes is currently not understood.

21  
22 The teleost neuroretina contains a stem cell niche called the ciliary marginal zone (CMZ). The  
23 CMZ is located at the retinal margin and harbours the retinal stem and progenitor cells that  
24 continuously generate new neurons in teleosts and amphibians (Hollyfield, 1971; Johns &  
25 Easter, 1977; Raymond Johns, 1977; Straznický & Gaze, 1971). Throughout postembryonic  
26 neurogenesis, multipotent, long-term self-renewing stem cells are located at the outermost  
27 periphery of the CMZ (Centanin et al., 2014; Raymond, Barthel, Bernardos, & Perkowski,  
28 2006; Tsingos et al., 2019; Wan et al., 2016). Adjacent to retinal stem cells are rapidly dividing  
29 progenitor cells, which have restricted proliferative potential, are more heterogeneous and  
30 comprise several populations in different stages of lineage specification (Centanin et al., 2014;  
31 Pérez Saturnino, Lust, & Wittbrodt, 2018; Raymond et al., 2006; Wan et al., 2016).

32  
33 A major integrator of organ size scaling within a growing organism is hormone signalling.  
34 Circulating hormones allow to translate extrinsic conditions such as nutrient availability into  
35 proportionate and coordinated growth of organs and body (Andersen et al., 2013; Boulan,  
36 Milán, & Léopold, 2015). The growth hormone signalling pathway centred around Insulin like  
37 growth factor (Igf) is well-known for its central role in regulating embryonic development and  
38 growth. A single nucleotide polymorphism in *igf1* present in small dog breeds was found to be  
39 a key factor for body size (Sutter et al., 2007). Mutations in *Igf1*, *Igf2* or *Igf1r* genes in mice,  
40 *Igf1r* knockdown in zebrafish, as well as naturally occurring mutations in *Igf1* and *Igf1r* in  
41 humans lead to severe dwarfism phenotypes (Baker, Liu, Robertson, & Efstratiadis, 1993;  
42 Klammt, Pfäffle, Werner, & Kiess, 2008; Liu, Baker, Perkins, Robertson, & Efstratiadis, 1993;  
43 Schlueter, Peng, Westerfield, & Duan, 2007), underscoring the importance of growth hormone  
44 signalling in size determination. In insects, insulin-like peptides are important integrators of  
45 organ growth with developmental progression (Colombani, Andersen, & Léopold, 2012).  
46 Ultimately, final organ size is specified by systemic signals and organ-specific responses,  
47 which are defined by discrete insulin sensitivity of each organ (Shingleton & Frankino, 2018).  
48 The expression and localisation of Igf pathway components during teleost embryonic and larval  
49 development has been assessed in a variety of species (Ayaso, Nolan, & Byrnes, 2002; Boucher  
50 & Hitchcock, 1998; Radaelli et al., 2003a; Radaelli, Patruno, Maccatrozzo, & Funkenstein,

1 2003b; Zygar, Colbert, Yang, & Fernald, 2005). Consistently, Igf ligands and receptors (Igfr)  
2 were found to be expressed in the retina in developmental and adult stages. The most detailed  
3 analysis stems from studies in postembryonic goldfish retinae where *igf1* is expressed in the  
4 retina and its binding sites are localised in the CMZ and IPL (Boucher & Hitchcock, 1998;  
5 Otteson, Cirenza, & Hitchcock, 2002). In zebrafish, Igf1r-mediated signalling is required for  
6 proper embryonic development, especially of anterior neural structures, and inhibition results  
7 in reduced body size, growth arrest and developmental retardation (Eivers, McCarthy, Glynn,  
8 Nolan, & Byrnes, 2004; Schlueter et al., 2007). Additionally, Igf1r knockdown leads to  
9 increased neuronal apoptosis, reduced proliferation and adversely affects cell cycle progression  
10 (Schlueter et al., 2007).

11 The role of Igf signalling in retinal stem cells has been studied in the postembryonic retina of  
12 chicken and quails where Igf1 or insulin injection increases proliferation in the CMZ (Fischer  
13 & Reh, 2000; Kubota, Hokoc, Moshiri, McGuire, & Reh, 2002). Despite the expression of its  
14 pathway components in the CMZ, the role of Igf1r signalling in the teleost CMZ as well as the  
15 consequences of its alteration for the continuously growing neuroretina have not been  
16 addressed.

17  
18 In this study, we elucidate the function of Igf1r signalling in the postembryonic retinal stem  
19 cell niche of the medaka fish. We establish that consistent with other fish species, signalling  
20 pathway components are expressed in the retina and specifically the CMZ. We find that global  
21 Igf inhibition reduces proliferation in the CMZ. Targeted, constitutive activation of Igf1r  
22 signalling specifically in CMZ stem and/or progenitor cells increases proliferation and leads to  
23 a prominent increase in eye size and uncouples eye size from body size. Importantly, the  
24 enlarged retinae are structurally intact and properly laminated, indicating that progenitor  
25 differentiation and neurogenesis is not disturbed. We demonstrate that Igf1r activation  
26 decreases cell cycle length in CMZ cells, expands the progenitor population and ultimately  
27 leads to increased neuronal cell numbers. By dissecting the individual contribution of stem  
28 cells and progenitor cells to eye size increase we uncover that only retinal progenitor but not  
29 stem cells are responsive to modulation by Igf1r signalling.

30

## 31 **Results**

### 32 **Igf1r signalling regulates proliferation in the medaka CMZ**

33 The retinal stem cell niche is located in a continuous ring in the CMZ at the periphery of the  
34 teleost eye (Fig. 1A). To address the involvement of the Igf signalling pathway in regulating  
35 retinal stem and progenitor cell proliferation in the medaka retina, we first assessed expression  
36 of receptors and ligands. We generated probes for several genes, of which *igf1ra*, *igf2* and *insrb*  
37 were reliably expressed in the CMZ as well as in specific layers of the differentiated retina  
38 (Fig. S1).

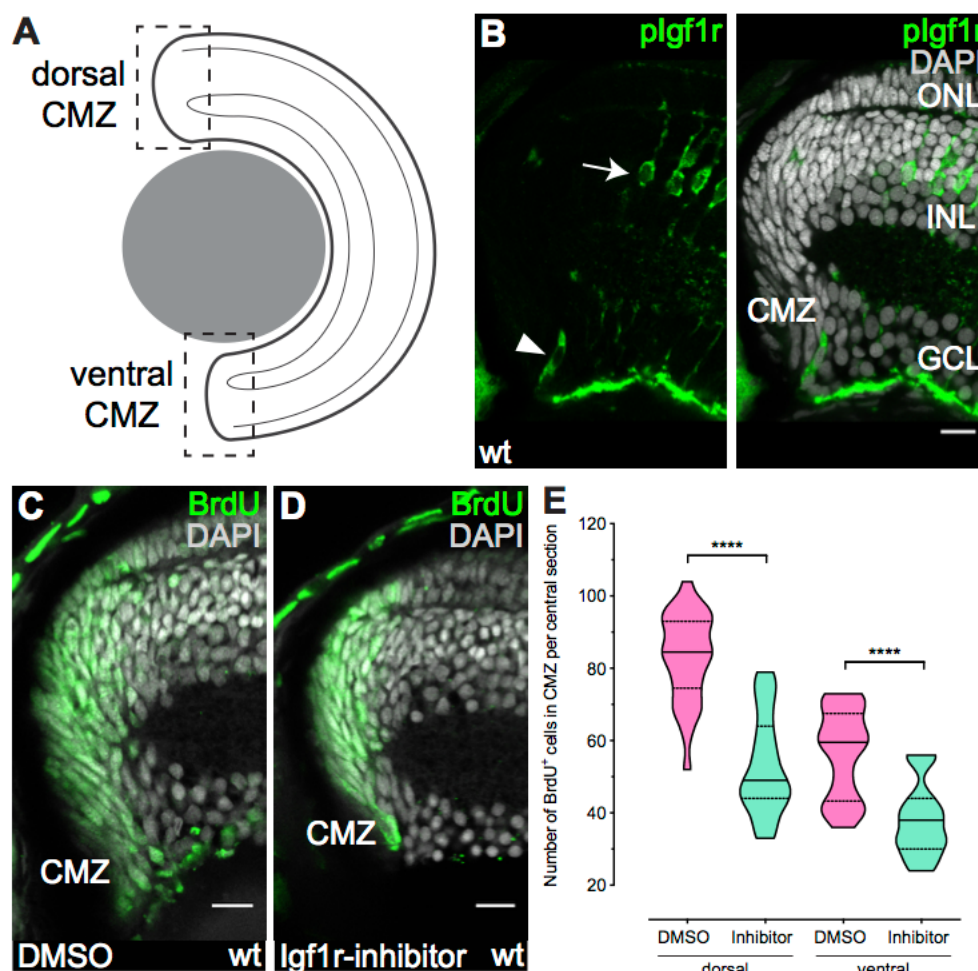

**Fig. 1: Igf1r signalling regulates proliferation in the CMZ.** (A) Schematic representation of a retinal section. Dashed squares represent dorsal (d) and ventral (v) CMZ. All CMZ sections in this paper depict the dorsal CMZ, with quantifications being done separately for dorsal (CMZ<sub>d</sub>) and ventral (CMZ<sub>v</sub>) CMZ due to inherent differences in proliferation, marker expression and morphology. (B) Cryosection of wildtype (wt) hatchling with anti-pIgf1r (green) staining shows that Igf1r is active in single cells in the CMZ (arrowhead, n = 65 cells in 58 sections from 10 retinæ) and in Müller glia cells (arrow) in the inner nuclear layer (INL). Scale bar is 10 µm; outer nuclear layer (ONL). (C-D) Wt hatchlings were incubated for 24 h in BrdU and 10 µM Igf1r inhibitor NVP-AEW541 or DMSO. Cryosections of DMSO- (C) and Igf1r-inhibitor-treated (D) retinæ with BrdU staining (green) display decreased BrdU incorporation upon Igf1r inhibition. Scale bars are 10 µm. (E) Quantification of the number of BrdU-positive cells in one Z plane per central section shows a decrease in Igf1r-inhibitor-treated retinæ (n = 26 (dorsal)/23 (ventral) sections from 10 retinæ) compared to DMSO (n = 28 (dorsal)/27 (ventral) sections from 10 retinæ) (median + quartiles, \*\*\*\*P<sub>d/v</sub> < 0.0001).

The activity of receptor tyrosine kinases like Igf1r is mediated by ligand-dependent dimerisation and subsequent trans-phosphorylation. To assess whether Igf1r is active in the CMZ, we performed immunostainings against phosphorylated Igf1r (pIgf1r). Single cells in the progenitor domain of the CMZ as well as Müller glia cells in the inner nuclear layer (INL) in the differentiated part of the retina were positive for pIgf1r (Fig. 1B).

Based on our Igf1r expression and activity data, we hypothesised that Igf signalling is involved in regulating proliferation in the CMZ. To determine the impact of Igf1r signalling on retinal stem and progenitor cell proliferation, we made use of the widely-used Igf1r inhibitor NVP-AEW541 (Chablais & Jazwinska, 2010; W.-Y. Choi et al., 2013; Huang et al., 2013) and BrdU to label S phase cells. Fish at hatching stage were incubated in 10 µM NVP-AEW541 or DMSO together with BrdU for 24 h, and analysed afterwards by immunostaining against BrdU (Fig.



1 1C, D). Inhibition of Igf1r signalling resulted in a 30 % decrease of S phase cells in the CMZ  
2 (Fig. 1E), validating that Igf1r-mediated signalling is crucial for proliferation in the CMZ.  
3 These results show that ligands and receptors of the Igf signalling cascade are expressed and  
4 active in the CMZ and that Igf signalling activity is necessary for CMZ proliferation.

5

### 6 **Constitutive activation of Igf1r in the CMZ results in increased eye size**

7 Based on the previous results, we hypothesized that Igf1r signalling represents a promising  
8 target to modulate differential growth of the retina. We therefore sought to induce precise  
9 continuous activation of Igf1r signalling in the CMZ.

10 We generated a transgenic line where a constitutively active *cd8a:igflra* chimeric receptor  
11 (*caigflr*) is expressed under the control of the *rx2* promoter, a retina-specific transcription  
12 factor. The *cd8a:igflra* variant was generated by an in-frame fusion of the extracellular and  
13 transmembrane domain of medaka *cd8a* and the intracellular domain of medaka *igflra*, as  
14 previously described (Carboni et al., 2005). The *rx2* promoter drives expression in stem cells  
15 and early multipotent progenitors in the CMZ as well as in Müller glia and photoreceptor cells  
16 in the differentiated retina (Reinhardt et al., 2015).

17 We validated the ability of the *rx2::caigflr* transgenic line to activate the signalling cascade  
18 downstream of Igf1r in *rx2*-positive cells by examining the phosphorylation status of Akt, a  
19 known downstream component of IGF signalling. We therefore performed immunostainings  
20 against pAkt on cryosections. In retinae of wildtype hatchlings, pAkt was present in the  
21 peripheral domain in the CMZ (Fig. S2A). In *rx2::caigflr* retinae pAkt staining covered a  
22 larger area and appeared brighter, overlapping with the *caigflr* expression domain (Fig. S2B).  
23 Strong pAkt signal was also evident in photoreceptor cells, which express *caigflr* as well.  
24 These results establish that the *rx2::caigflr* transgenic line is able to activate Akt downstream  
25 of Igf1r in the medaka CMZ.

26 To address the potential of Igf1r signalling to induce differential retinal growth we next  
27 examined hatchlings for changes in retinal morphology related to *rx2::caigflr* expression.  
28 Intriguingly, transgenic *rx2::caigflr* hatchlings displayed a prominent increase in eye size  
29 compared to wildtype siblings (Fig. 2A-C), with otherwise normal head size and body length  
30 (Fig. S3A-C). Relative eye size (anterior-posterior eye diameter normalised to body length)  
31 was significantly increased in *rx2::caigflr* hatchlings (Fig. 2D). The increase in relative eye  
32 size persisted throughout postembryonic growth until adulthood (Fig. 2E).

33 This data shows that CMZ-targeted activation of Igf1r signalling is able to uncouple retinal  
34 growth from overall body growth in medaka.

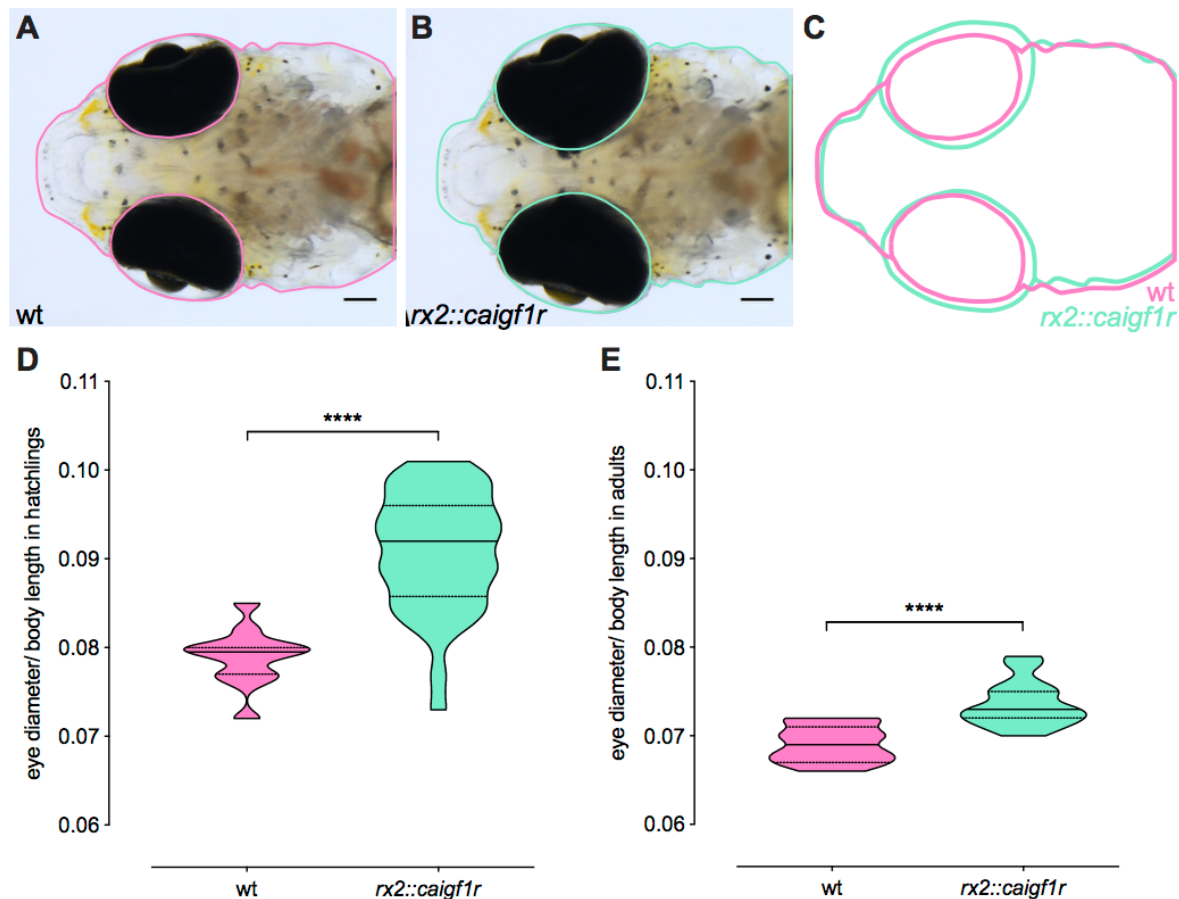

1  
2 **Fig. 2: Constant activation of Igf1r in retinal stem and progenitor cells results in increased eye size.**  
3 (A-C) Eye size of *rx2::caigf1r* hatchlings (B) is larger compared to wt siblings (A). Scale bars are 100 µm.  
4 (D-E) Quantification of relative eye size (eye diameter normalised to body length) of wt (D: n = 12; E: n =  
5 11) and *rx2::caigf1r* (D: n = 38; E: n = 15) hatchlings (D) and adults (E) (median + quartiles, \*\*\*\*P <  
6 0.0001).

7  
8 **Retinal enlargement stems from neuroretinal expansion through increase in cell number**

9 Size increase of a tissue can arise due to different mechanisms of tissue expansion, such as  
10 increase in cell size or number, or stretching and increase in fluid or pressure (Ritchey, Zelinka,  
11 Tang, Liu, & Fischer, 2012; Stujenske, Dowling, & Emran, 2011; Veth et al., 2011). To  
12 understand how Igf1r signalling could mediate eye size increase, we examined cryosections of  
13 wildtype and *rx2::caigf1r* hatchling retinæ. *Rx2::caigf1r* eyes exhibited a prominent  
14 expansion of the neuroretina in contrast to wildtype controls (Fig. 3A, B). Importantly, nuclear  
15 morphologies and arrangement indicated that the overall retinal architecture in *rx2::caigf1r*  
16 fish remained intact. The stereotypical structure of the neuroretina with the CMZ at the  
17 periphery and three nuclear and two plexiform layers in the differentiated part was undisturbed  
18 by retinal expansion.

19 We assessed retinal topology further using the expression of *rx2*. Both peripheral *rx2*  
20 expression in the CMZ as well as central expression in Müller glia cells and photoreceptors  
21 showed an identical pattern between wildtype and *rx2::caigf1r* retinæ, indicating that these  
22 cell populations are present (Fig. 3A, B). To characterise neuroretina expansion in more detail,  
23 we measured the thickness of the neuroretina in *rx2::caigf1r* and wildtype retinæ.  
24 Measurements of the retinal column were taken in the peripheral but fully laminated region of  
25 the retina, along a line perpendicular to the inner plexiform layer (IPL) (Fig. 3C, D). Retinal  
26 column thickness was increased by 20 µm on average in the dorsal as well as ventral retina  
27 (Fig. 3E). We additionally measured retinal column thickness in central regions, which reflect

1 the embryonic contribution as *rx2* is also expressed in retinal progenitor cells during  
 2 development. Thickness of the central neuroretina in *rx2::caigf1r* hatchlings was also increased  
 3 compared to wildtype. However, the increase was greatest in more peripheral CMZ-derived  
 4 regions, arguing for a greater impact of the postembryonic contribution through the CMZ (Fig.  
 5 S4A). Analysis of the thickness of individual neuroretina layers showed that all nuclear layers  
 6 and the outer plexiform layer (OPL) increased their thickness. The most prominent expansion  
 7 took place in the INL (Fig. S4B-F), accounting for up to 15  $\mu\text{m}$  of the 20  $\mu\text{m}$  increase in  
 8 *rx2::caigf1r* retinæ. In contrast, the IPL showed decreased thickness in the ventral retina (Fig.  
 9 S4C). To determine whether the expansion was due to enlarged cell size, we quantified the  
 10 number of nuclei in a 20 x 20  $\mu\text{m}$  square region in the INL as an approximation for cell size.  
 11 The number of nuclei remained constant between wildtype and *rx2::caigf1r* retinæ (Fig. 3F),  
 12 indicating that cell size is not enlarged.  
 13 Taken together, these results show that the activation of *Igf1r* signalling in the CMZ increases  
 14 retinal size, and the enlargement stems from neuroretinal expansion through an increase in cell  
 15 number rather than cell size.

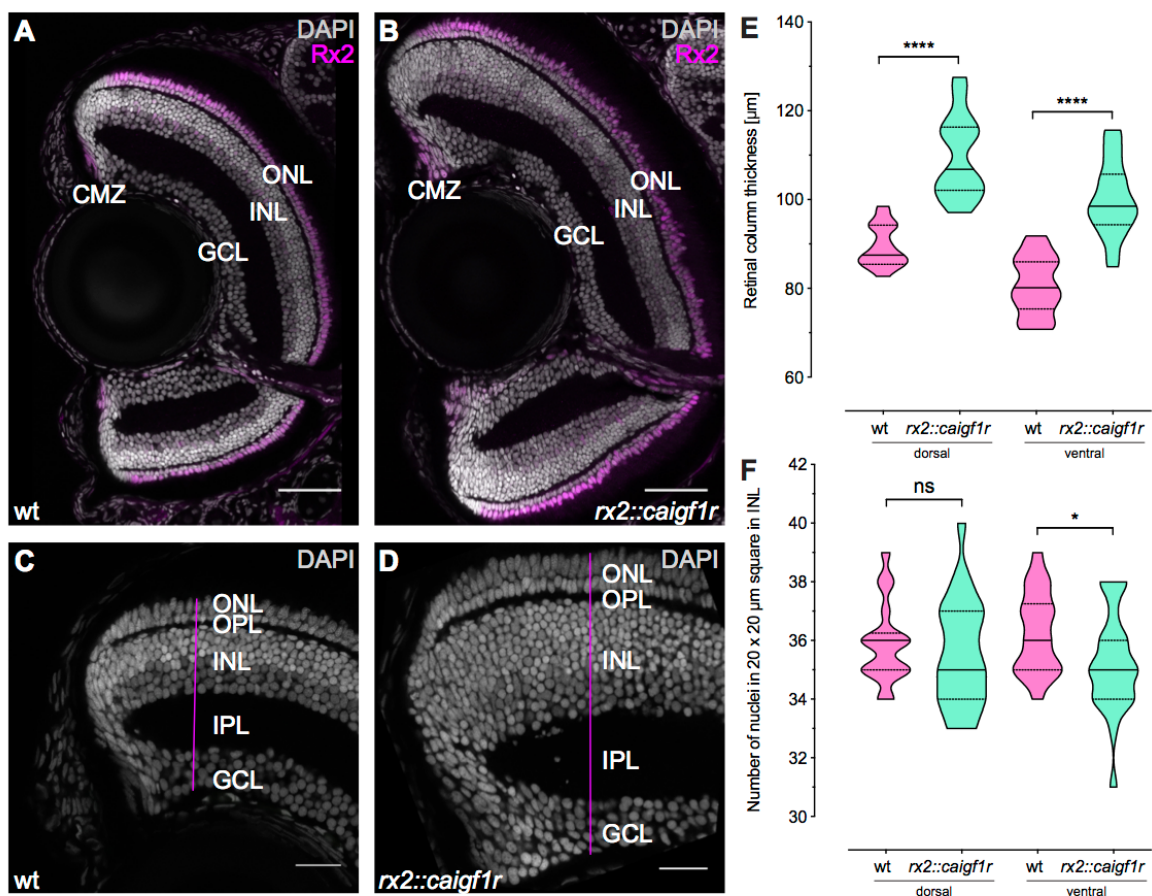

16  
 17 **Fig. 3: Retinal enlargement stems from neuroretinal expansion through increase in cell number.** (A-  
 18 B) Cryosections of wt (A) and *rx2::caigf1r* (B) hatchling retinæ with staining against Rx2 (magenta) display  
 19 neuroretinal expansion. Scale bars are 50  $\mu\text{m}$ . (C-D) Thickness measurements were done along a line  
 20 (magenta) perpendicular to the inner plexiform layer (IPL). Thickness of the whole retinal column and all  
 21 individual layers were measured in the fully laminated part close to the CMZ in wt (n = 18 sections from 12  
 22 retinæ) and *rx2::caigf1r* (n = 24 sections from 14 retinæ) retinæ. Scale bars are 20  $\mu\text{m}$ . (E) Quantification  
 23 of retinal column thickness in the dorsal as well as ventral retina shows increase in *rx2::caigf1r* (n = 24  
 24 sections from 14 retinæ) compared to wt (n = 18 sections from 12 retinæ) retinæ (median + quartiles,  
 25 \*\*\*\* $P_{d/v} < 0.0001$ ). (F) Quantification of nucleus number in a 20 x 20  $\mu\text{m}$  INL region shows similar amounts  
 26 in *rx2::caigf1r* (n = 24 sections from 14 retinæ) and wt (n = 18 sections from 12 retinæ) retinæ (median +  
 27 quartiles, <sup>ns</sup> $P_d = 0.5031$ , \* $P_v = 0.0456$ ).  
 28

1 **Igf1r signalling activation decreases cell cycle length in the CMZ**  
 2 Igf1r signalling has been shown to influence cell cycle progression in different *in vitro* and *in*  
 3 *vivo* models (Hodge, D'Ercole, & O'Kusky, 2004; Schlueter et al., 2007). To determine whether  
 4 Igf1r signalling activation in *rx2::caigflr* fish affects the cell cycle of proliferating cells in the  
 5 CMZ, we next analysed cell cycle and S phase length of the retinal progenitor population in  
 6 wildtype and *rx2::caigflr* hatchlings. To this end, we deployed an established experimental  
 7 regime using BrdU and EdU pulses (Das, Choi, Sicinski, & Levine, 2009; Klimova & Kozmik,  
 8 2014). Hatchlings were incubated in BrdU for 2 h, washed, and incubated in EdU for 30 min  
 9 before analysis. Immunostainings against BrdU, EdU and PcnA (Fig. 4A, B) allowed to  
 10 quantify different fractions of single and double-positive cells, from which cell cycle and S  
 11 phase length were calculated. In *rx2::caigflr* retinae, the cell cycle length was decreased from  
 12 12 h to 10.5 h on average (Fig. 4C), whereas S phase length remained constant with an average  
 13 duration of 4.5 h (Fig. 4D). Moreover, in *rx2::caigflr* compared to wildtype fish, the number  
 14 of BrdU-positive cells in the CMZ was more than doubled (Fig. 4E).  
 15 Taken together, these data show that in *rx2::caigflr* hatchlings, more cells in the CMZ go  
 16 through the cell cycle faster, thereby increasing retinal cell numbers resulting in increased  
 17 retinal size and expanded retinal layers.

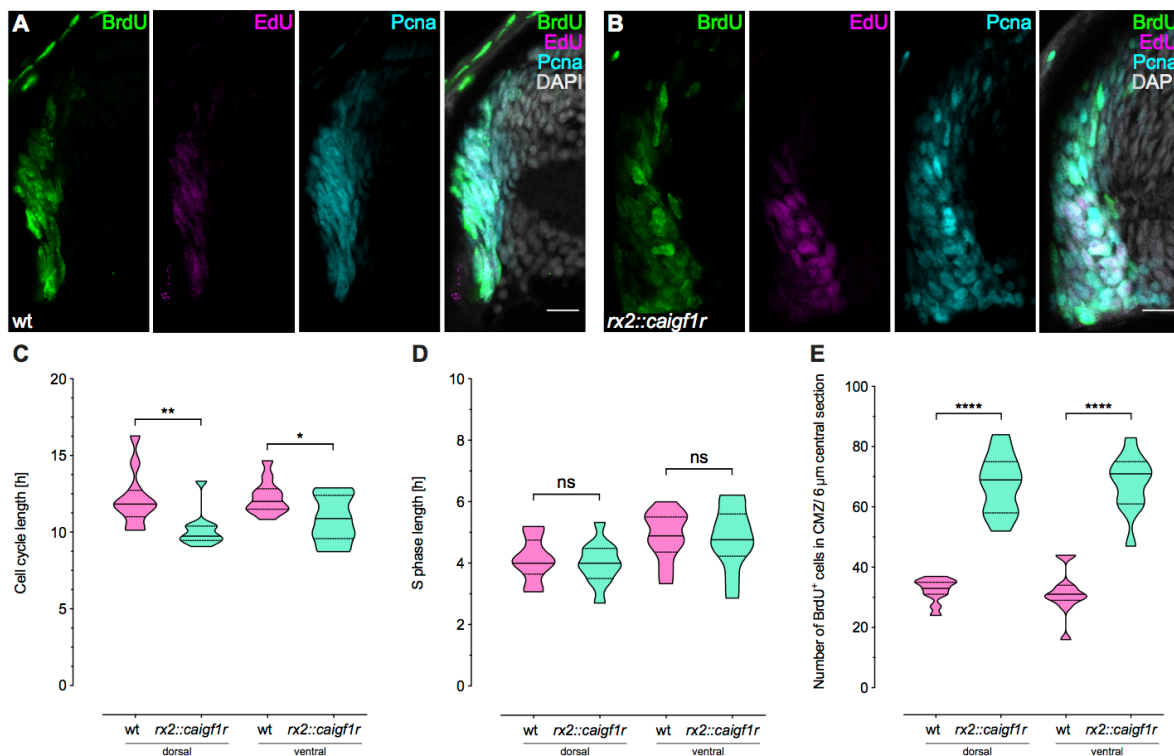

18 **Fig. 4: Constant activation of Igf1r signalling decreases cell cycle length in the CMZ.** (A-B)  
 19 Cryosections of wt (A) and *rx2::caigflr* (B) hatchling retinae incubated for 2 h in BrdU and 30 min in EdU  
 20 to determine cell cycle length. Staining against BrdU (green), EdU (magenta) and PcnA (cyan) show partial  
 21 overlap in the CMZ. Scale bars are 10 μm. (C) Quantification of cell cycle length shows a reduction of 1-2  
 22 h in *rx2::caigflr* (n = 11 sections from 4 retinae) compared to wt (n = 11 sections from 4 retinae) retinae  
 23 (median + quartiles, \*\* $P_d = 0.0053$ , \* $P_v = 0.0188$ ). (D) Quantification of S phase length in *rx2::caigflr* (n =  
 24 11 sections from 4 retinae) compared to wt (n = 11 sections from 4 retinae) retinae (median + quartiles,  $^{ns}P_d$   
 25 = 0.6764,  $^{ns}P_v = 0.8223$ ). S phase length is not altered in *rx2::caigflr* retinae. (E) Quantification of BrdU-  
 26 positive cell number in the CMZ per 6 μm central section shows that numbers have more than doubled in  
 27 *rx2::caigflr* (n = 11 sections from 4 retinae) compared to wt (n = 11 sections from 4 retinae) retinae (median  
 28 + quartiles, \*\*\*\* $P_{d/v} < 0.0001$ ).  
 29  
 30  
 31



1 **Activation of Igf1r signalling in the CMZ increases retinal progenitor but not stem cell**  
 2 **number**

3 We observed a relative eye size increase when specifically activating Igf signalling both in  
 4 stem and progenitor cells by expressing the constitutively activated receptor under the control  
 5 of the stem and progenitor cell-specific promoter *rx2* (*rx2::caigflr*). Differential responses of  
 6 retinal stem and progenitor cells to extrinsic stimuli have been previously described (Centanin  
 7 et al., 2014; Love, Keshavan, Lewis, Harris, & Agathocleous, 2014), which prompted us to  
 8 disentangle the contribution of each cell population to the expansion in response to Igf1r  
 9 signalling modulation. Hence, we sought a more specific driver to target IGF modulation  
 10 exclusively to stem cells. We therefore analysed the cytosolic non-specific dipeptidase  
 11 *zgc:114181* (hereafter *cdnp*) promoter, which was found to have promising CMZ-restricted  
 12 retinal expression but was not characterised in detail (Haas, Wittbrodt and Wittbrodt,  
 13 unpublished).

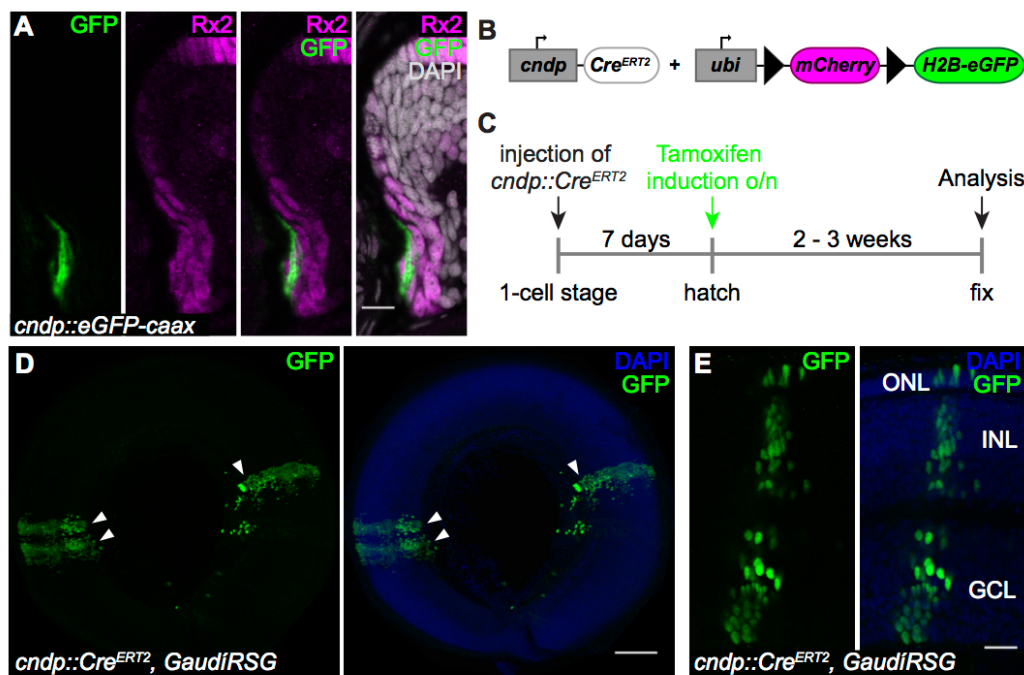

14 **Fig. 5: *Cndp* is expressed in multipotent neuroretinal stem cells.** (A) Cryosection of a *cndp::eGFP-caax*  
 15 hatchling retina with staining against GFP (green) in a peripheral subset of the Rx2 (magenta) domain in the  
 16 CMZ. Scale bar is 10 µm. (B) Schematic representation of the constructs used for lineage tracing. Upon  
 17 tamoxifen induction, *mCherry* is floxed out and *H2B-eGFP* is expressed in GaudiRSG fish. (C)  
 18 Experimental outline: *cndp::Cre<sup>ERT2</sup>* is injected in 1-cell stage GaudiRSG embryos. At hatch, fish are  
 19 incubated in tamoxifen overnight and grown for 2 - 3 weeks before analysis. (D-E) Whole-mount  
 20 immunostainings of *cndp::Cre<sup>ERT2</sup>*, GaudiRSG retinæ against GFP (green) with neuroretinal clones (D)  
 21 labelling the whole retinal column (E) and extending into the ciliary epithelium, originating from multipotent  
 22 neuroretinal stem cells (arrowheads) (n = 7 clones in 3 retinæ). Scale bars are 100 µm (D) and 20 µm (E).  
 23  
 24

25 We characterised the 5 kb promoter region upstream of *cndp* by generating transgenic reporter  
 26 lines (*cndp::eGFP-caax*, *cndp::H2A-mCherry*). *Cndp* expression was detected in the retina  
 27 (Fig. 5A) and the choroid plexi in the brain (Fig. S5A, B). In the retina, *cndp*-positive cells  
 28 were found exclusively in a small, peripheral subset of Rx2-positive cells in the CMZ (Fig.  
 29 5A). To functionally validate the potential of *cndp*-expressing cells, we employed a Cre/loxP-  
 30 mediated lineage tracing approach. We generated a construct where a Tamoxifen-inducible  
 31 Cre<sup>ERT2</sup> was expressed under the control of the *cndp* promoter (Fig. 5B) and combined it with  
 32 the GaudiRSG red-switch-green reporter line (Centanin et al., 2014). GaudiRSG embryos were  
 33 injected with the *cndp::Cre<sup>ERT2</sup>* plasmid at 1-cell stage and induced with Tamoxifen at  
 34 hatchling stage. After 2-3 weeks, fish were analysed for GFP expression by whole-mount



1 immunostaining (Fig. 5C). Retinae displayed GFP-positive clones that originated in the CMZ  
 2 and were continuous to the differentiated retina (Fig. 5D), while also extending into the ciliary  
 3 epithelium. These clones labelled cells in all three nuclear layers (Fig. 5E) and thus were  
 4 categorised as induced Arched Continuous Stripes (iArCoS, (Centanin et al., 2014)).  
 5 Importantly, we did not observe clonal footprints originating from progenitor cells which  
 6 establishes *cndp* as a bona fide marker for neuroretinal stem cells.

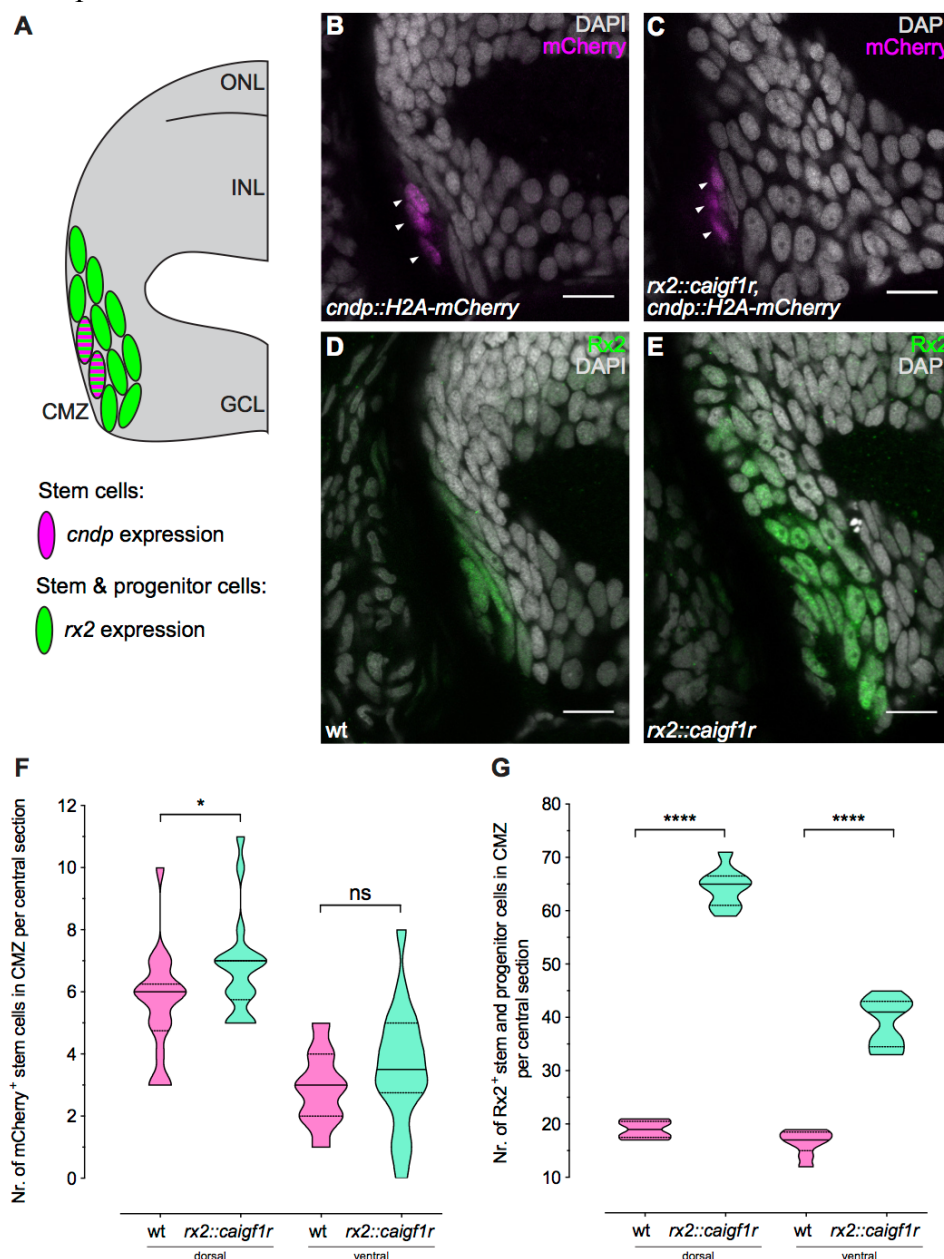

7  
 8 **Fig. 6: Constant activation of Igf1r signalling expands retinal progenitor cell numbers.** (A) Schematic  
 9 representation of the dorsal CMZ of a retinal section with *cndp* (magenta) and *rx2* (green) expression in stem  
 10 and progenitor cells. (B-C) Cryosections of wt (B) and *rx2::caigf1r* (C) *cndp::H2A-mCherry* reporter  
 11 hatchling retinae. mCherry (magenta) is visible in peripheral-most cells in the CMZ (arrowheads). (D-E)  
 12 Cryosections of wt (D) and *rx2::caigf1r* (E) hatchling retinae. Rx2 staining (green) marks peripheral cells  
 13 in the CMZ. (F) Quantification of H2A-mCherry-positive cell number in the CMZ of 16  $\mu$ m central sections  
 14 does not indicate an expansion of *cndp*-positive stem cells in *rx2::caigf1r* (n = 18 sections from 6 retinae)  
 15 compared to wt (n = 18 sections from 6 retinae) retinae (median + quartiles, \* $P_d = 0.0442$ ,  $^{ns}P_v = 0.2177$ ).  
 16 (G) Quantification of Rx2-positive cell number in the CMZ of 16  $\mu$ m central sections demonstrates that Rx2-  
 17 positive stem and progenitor cells have more than doubled in *rx2::caigf1r* (n = 9 sections from 6 retinae)  
 18 compared to wt (n = 9 sections from 6 retinae) retinae (median + quartiles, \*\*\*\* $P_{d/v} < 0.0001$ ).

1 To understand whether stem and progenitor cells possess similar responsiveness to activated  
2 Igf1r signalling we made use of the specific expression domains of *cndp* and *rx2* in different  
3 retinal stem (*cndp*, *rx2*) and progenitor (*rx2*) cell populations (Fig. 6A). The *cndp::H2A-*  
4 *mCherry* reporter line was used to identify retinal stem cells, and the Rx2 antibody to label  
5 both retinal stem and progenitor cells (Reinhardt et al., 2015).  
6 We assessed the number of retinal stem cells expressing *cndp* by immunostainings on wildtype  
7 and *rx2::caigf1r* hatchlings, positive for the *cndp::H2A-mCherry* reporter (Fig. 6B, C). In both  
8 wildtype and *rx2::caigf1r* retinae the number of *cndp*-positive stem cells per section was low,  
9 ranging from 3 to 11 in the dorsal and 0 to 8 in the ventral CMZ. The number of *cndp*-positive  
10 stem cells was rather stable, with a slight increase in *rx2::caigf1r* retinae (Fig. 6F). In contrast  
11 to that, the Rx2 domain was prominently expanded in *rx2::caigf1r* versus wildtype hatchlings  
12 (Fig. 6D, E), with Rx2-positive stem and progenitor cells in the CMZ being more than doubled  
13 in *rx2::caigf1r* retinae (Fig. 6G), arguing that the progenitor, but not the stem cell population  
14 is expanded by Igf1r signalling activation.  
15 Since we found almost no increase in stem cell numbers in retinae of *rx2::caigf1r* hatchlings,  
16 we next wanted to understand whether retinal stem cells are not responding to Igf1r signalling  
17 modulation. We generated a transgenic line in which Igf1r signalling activation is targeted to  
18 *cndp*-positive retinal stem cells and expressed *caigf1r* under the control of the stem cell-  
19 specific *cndp*-promoter (*cndp::caigf1r*). Functionality of the construct was evident through the  
20 enlargement of the choroid plexi compared to wildtype siblings (Fig. S6A, B). However, the  
21 GFP expression domain in the retina was unaltered (Fig. S6C). Additionally, we examined  
22 relative eye size in hatchlings of two independent lines derived from different founders. Neither  
23 *cndp::caigf1r* line displayed an alteration in relative eye size compared to its wildtype siblings  
24 (Fig. S6D). These results demonstrate that the *cndp*-expressing retinal stem cell population  
25 does not expand upon Igf1r signalling activation. This further confirms and refines our findings  
26 that only the progenitor but not stem cell population is expanded in *rx2::caigf1r* retinae.  
27 Taken together, we demonstrate that retinal growth can be uncoupled from overall body growth  
28 through the activation of Igf1r signalling targeted to the CMZ. This intrinsic modulation elicits  
29 differential responses in stem and progenitor cell populations in the medaka retina, leading to  
30 a shortened cell cycle and consequential increase of retinal progenitor but not stem cell  
31 numbers.

## 32 33 **Discussion**

34 In this study, we investigated how the growth of an organ can be uncoupled from overall body  
35 growth in medaka fish. We focused on the retina and dissected the role of Igf1r signalling in  
36 regulating proliferation of the retinal stem cell niche and changes in retina size. We found that  
37 the retinal stem cell niche is permissive for mitogenic signalling mediated by Igf1r activity.  
38 Using a combination of expression analysis and gain- as well as loss-of-function approaches,  
39 we examined the function of Igf1r signalling in the postembryonic retinal stem cell niche of  
40 medaka. Ligands and receptors of the Igf pathway are expressed in the postembryonic retina  
41 and specifically in the CMZ, indicating a local paracrine signalling hub. Furthermore, the  
42 pathway is active in sparse progenitors in the CMZ. Inhibition of Igf1r signalling leads to  
43 decreased proliferation of retinal stem and progenitor cells. CMZ-targeted constitutive  
44 activation results in a dramatic increase of eye size originating from cell number increase. We  
45 determined that this effect is caused by the specific expansion of the progenitor cell pool by  
46 speeding up the cell cycle without affecting the subsequent differentiation potential, while  
47 retinal stem cells do not respond to Igf1r signalling activation (Fig. 7).

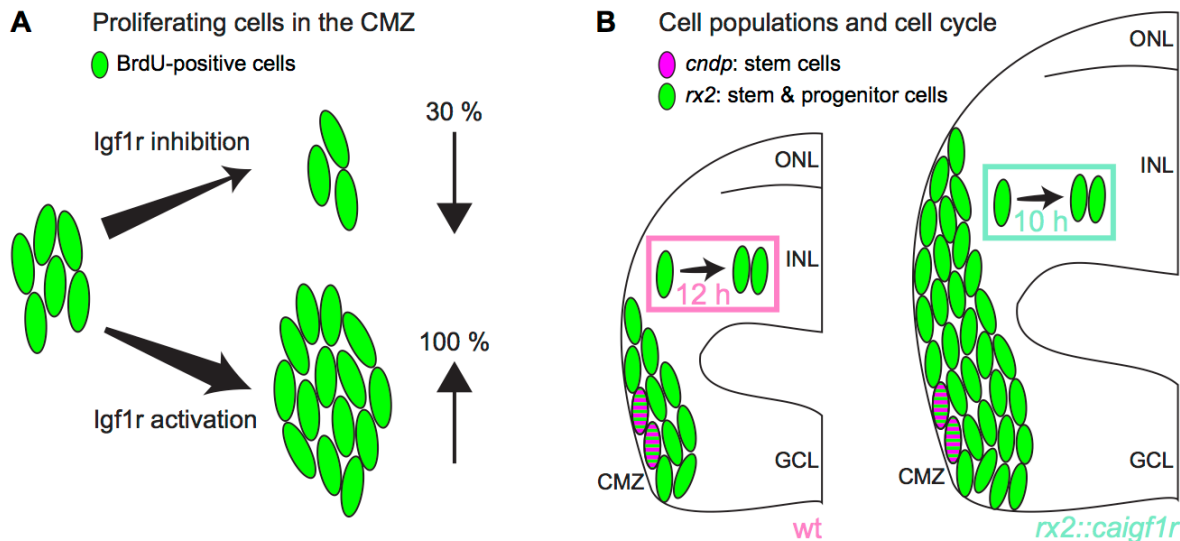

**Fig. 7: Igf1r signalling regulates proliferation and progenitor population size in the CMZ.** (A) Igf1r inhibition decreases proliferating cells (green) in the CMZ by 30 %, while Igf1r activation increases proliferation by  $\geq 100$  %. (B) Igf1r activation in the CMZ in *rx2::caigf1* fish expands progenitor numbers (*rx2*-positive, green), but does not enlarge the stem cell population (*cndp*-positive, magenta). Cell cycle in the CMZ is shortened from 12 h in wildtype fish to 10 h upon Igf1r activation in *rx2::caigf1* fish.

We showed that constitutive activation of Igf1r signalling expands only the *rx2*-positive progenitor but not stem cell population. Targeting stem cells by specific Igf1r activation in *cndp*-expressing cells does not impact on retinal size, indicating that retinal stem cells do not respond to Igf1r signalling with increased proliferation. In contrast, progenitor numbers are more than doubled in response to constant activation of Igf1r signalling, rendering the *rx2*-positive progenitor population receptive for this mitogenic stimulus. Since slowly dividing stem cells act as long-lasting reservoir for a continuous and secure replenishment of rapidly cycling progenitor cells, their requirements differ with regard to ensuring genomic stability and integrity in order to prevent whole lineages from acquiring detrimental mutations. This difference could be explained by distinctive downstream signal transduction and absence thereof, or specific safeguarding of stem cells against unwarranted mitogenic stimuli. Tumour suppressor genes are likely candidates to impede deviant proliferation. For example, adult *p53* knockout mice display increased neural stem cell proliferation in the subventricular zone, supporting a regulatory role of *p53* in controlling proliferation in this niche (Gil-Perotin et al., 2006; Meletis et al., 2006).

Differential responses of stem and progenitor cells have been observed after nutrient deprivation in the *Xenopus* retina. Whereas stem cells are resistant to nutrient deprivation and mTOR inhibition, retinal progenitors respond with changes in proliferation and differentiation in an mTOR-mediated manner (Love et al., 2014). These differences between retinal stem and progenitor cells are similar to our observations where stem cells are not responsive to a mitogenic stimulus mediated by Igf1r, while progenitor proliferation is increased. It is important to note that we observe a local, cell-intrinsic effect of a targeted stimulus, while Love and colleagues examine a global effect on a local cell population. In the future, it will be exciting to profile transcriptional changes in retinal stem cells in our model of Igf1r activation to address whether stem cells resist to changes by adaptation of intrinsic signalling networks or whether they are unable to be changed at all.

Upon Igf1r signalling activation, the thickness of the neuroretina drastically increases. Intriguingly, enlarged retinæ are structurally intact displaying proper lamination and

1 differentiation. While retinal enlargement due to enhanced progenitor proliferation might be  
2 an expected phenotype, we were surprised by the perfect morphological arrangement of retinal  
3 cells in *rx2::caigflr* fish. Interestingly, upon *Yap* mRNA injection in *Xenopus* embryos,  
4 tadpoles display enlarged eyes with more proliferating cells in the retina, but retinal  
5 morphology and lamination is disturbed (Cabochette et al., 2015). Conversely, *Yap* knockdown  
6 leads to a decrease in S phase length, whereas the overall cell cycle length is increased. We  
7 observed that *Igf1r* expression leads to overall cell cycle shortening, but the S phase is not  
8 affected, which is in agreement with results from various systems where *Igf* signalling  
9 influences G1 or G2 phase length (Hodge et al., 2004; Schlueter et al., 2007; S. Wang, Wang,  
10 Wu, & Han, 2015). Increase in retinal size has also been observed in a zebrafish retina mutant  
11 for *patched2* where retinal patterning and retinal morphology are largely intact, only Müller  
12 glia numbers are negatively affected (Bibliowicz & Gross, 2009). Furthermore, retinal  
13 progenitor cells in the CMZ are expanded while keeping a constant cell cycle length.  
14 Contrastingly, we observed a shortened cell cycle in the progenitor population which is likely  
15 causal for its expansion in *rx2::caigflr* fish.

16  
17 Teleost species display a great variety in retinal size, architecture and cell type composition  
18 dependent on their photic environment and habitat. Surface-dwelling fish like medaka have  
19 two layers of photoreceptors, one light-sensitive rod and one cone layer responsible for colour  
20 vision, while zebrafish possess one layer of cones and already three to four layers of rods for  
21 enhanced light perception, as they live in deeper waters (Lust & Wittbrodt, 2018). Interestingly,  
22 retinæ of many deep-sea fish possess predominantly rods at the expense of other retinal  
23 neurons, resulting in high rod to ganglion cell convergence for enhanced light sensitivity  
24 (Darwish, Mohalal, Helal, & El-Sayyad, 2015; de Busserolles, Fitzpatrick, Marshall, & Collin,  
25 2014; Wagner, Fröhlich, Negishi, & Collin, 1998). Whether the functionality of the enlarged  
26 retina in *rx2::caigflr* fish concerning circuitry, visual acuity and light sensitivity is the same  
27 as in wildtype fish remains to be studied. We did not observe apparent behavioural changes in  
28 these fish, however testing for example responsiveness to visual stimuli as well as visual acuity  
29 measurements could give insights into adaptations resulting from eye size change.

30  
31 The isolated size increase of an apparently functional sensory organ leads us to speculate about  
32 the evolutionary and ecological significance of retinal size and architecture. Throughout the  
33 teleost clade, different adaptations to specific habitats and niches are evident in the retina. One  
34 particularly interesting example is the four-eyed fish *Anableps anableps*, which displays  
35 structural differences within the retina to accommodate its specific optic requirements. This  
36 species features eyes that partly protrude over the top of their skull and are above the water  
37 surface while the lower half of the eye is submerged just below the surface. Subsequently,  
38 composition and thickness of the retina differs between ventral and dorsal halves, which are  
39 equipped for aerial and aquatic vision, respectively. The ventral retina features an INL that is  
40 twice as thick as the dorsal INL, concordant with increased proliferation in the ventral  
41 compared to the dorsal CMZ during larval development (Perez et al., 2017). Therefore,  
42 proliferative regulation and relative cell type composition in the differentiated retina must  
43 differ in ventral and dorsal halves. As we found a pronounced increase in INL thickness upon  
44 *Igf1r* signalling activation, it is tempting to speculate that *Igf* signalling plays a role in  
45 manifesting the structural differences in the *Anableps anableps* retina. In the teleost retina,  
46 several populations of lineage-specified progenitors reside in the CMZ, and modification of  
47 their transcriptional signatures shift cell type ratios (Pérez Saturnino et al., 2018). Based on the  
48 preferential accumulation of INL cells in the ventral retina of *Anableps anableps*, one possible  
49 scenario is that a progenitor population lineage-committed to generate INL cells is expanded  
50 and proliferates more.



1 The susceptibility of retinal progenitor cells to altered Igf signalling might permanently modify  
2 retinal architecture, ultimately facilitating the rapid occupation of new ecological niches  
3 followed by subsequent speciation. We propose that Igf signalling can act as an evolutionary  
4 hub, through which retinal size, morphology and cell type composition is altered by modifying  
5 signalling activity in distinct populations of progenitor cells in the CMZ.

## 7 **Materials and Methods**

### 9 Animals and transgenic lines

10 Medaka (*Oryzias latipes*) used in this study were kept as closed stocks at Heidelberg  
11 University. All experimental procedures and husbandry were performed in accordance with the  
12 German animal welfare law and approved by the local government (Tierschutzgesetz §11, Abs.  
13 1, Nr. 1, husbandry permit AZ 35–9185.64/BH and line generation permit AZ 35–9185.81/G-  
14 145-15). Fish were maintained in a constant recirculating system at 28°C on a 14 h light/10 h  
15 dark cycle. The following stocks and transgenic lines were used: wildtype Cabs, *Heino* mutants  
16 (Loosli et al., 2000), *rx2::caigflr rx2::lifeact-eGFP*, *cn dp::H2A-mCherry*, *cn dp::eGFP-caax*,  
17 *cn dp::H2B-eGFP*, *cn dp::caigflr cn dp::H2B-eGFP*, *cn dp::Cre<sup>ERT2</sup>*, *GaudiRSG* (Centanin et  
18 al., 2014). All transgenic lines were created by microinjection with Meganuclease (I-SceI) in  
19 medaka embryos at the one-cell stage, as previously described (Thermes et al., 2002).  
20 The constitutively active Igflr variant (caIgflr, Cd8a:Igflra) was generated by an in-frame  
21 fusion of the codon-optimised extracellular and transmembrane domain of olCd8a (synthesised  
22 by Geneart) and the intracellular domain of olIgflra, as previously described (Carboni et al.,  
23 2005). The *cn dp::Cre<sup>ERT2</sup>* plasmid was generated by cloning the 5 kb *cn dp* regulatory region  
24 in a pBS/I-SceI-vector containing a tamoxifen-inducible Cre recombinase. The plasmid  
25 contains *cm lc2::eCFP* as insertional reporter.

### 27 BrdU/EdU incorporation

28 For BrdU incorporation, hatchlings were incubated in 2.5 mM BrdU (Sigma-Aldrich) diluted  
29 in 1x embryo rearing medium (ERM, 17 mM NaCl, 40 mM KCl, 0.27 mM CaCl<sub>2</sub>, 0.66 mM  
30 MgSO<sub>4</sub>, 17 mM Hepes) for 2 h. For EdU incorporation, hatchlings were incubated in 250 μM  
31 EdU (ThermoFisher) diluted in 1x ERM for 30 min. Quantification of BrdU-positive cells was  
32 performed in four retinæ from individual hatchlings. Cell counts were performed in  $z = 6 \mu\text{m}$   
33 of two to three central sections per retina.

### 35 Igflr inhibition

36 For inhibition of Igflr, hatchling fish were incubated in 10 μM NVP-AEW541 (Selleckchem)  
37 diluted in 1x ERM at 28°C for 24 h. In a parallel control group, hatchling fish were incubated  
38 in 0.001 % DMSO/1x ERM at 28°C for 24 h. Directly afterwards fish were euthanised and  
39 fixed for analysis.

### 41 Induction of Cre/lox system

42 For Cre<sup>ERT2</sup> induction, hatchlings were treated with a 5 μM tamoxifen solution (Sigma-Aldrich)  
43 in 1x ERM overnight.

### 45 Immunohistochemistry on cryosections

46 Fish were euthanised using 20x Tricaine and fixed overnight in 4 % PFA, 1x PTW at 4°C.  
47 After fixation samples were washed with 1x PTW and cryoprotected in 30 % sucrose in 1x  
48 PTW at 4°C. To improve section quality, the sections were incubated in a half/half mixture of  
49 30 % sucrose and Tissue Freezing Medium for at least 3 days at 4°C. 16 μm thick serial sections  
50 were obtained on a cryostat. Sections were rehydrated in 1x PTW for 30 min at room



1 temperature. Blocking was performed for 1-2 h with 10 % NGS (normal goat serum) in 1x  
 2 PTW at room temperature. The respective primary antibodies were applied diluted in 1 % NGS  
 3 o/n at 4°C. The secondary antibody was applied in 1 % NGS together with DAPI (Sigma-  
 4 Aldrich, D9564; 1:500 dilution in 1x PTW of 5 mg/ml stock) for 2-3 h at 37°C. Slides were  
 5 mounted with 60 % glycerol and kept at 4°C until imaging.

#### 7 BrdU and PcnA immunohistochemistry on cryosections

8 BrdU and PcnA antibody staining was performed with an antigen retrieval step. After all  
 9 antibody stainings and DAPI staining, except for BrdU/PcnA, were complete, a fixation for 30  
 10 min was performed with 4 % PFA. Slides were incubated for 1.5 h at 37°C in 2 N HCl solution,  
 11 and pH was recovered by washing with a 40 % Borax solution in 1x PTW before incubation  
 12 with the primary BrdU or PcnA antibody.

#### 14 EdU staining on cryosections

15 EdU staining reaction was performed after all other antibody stainings were completed using  
 16 the Click-iT™ EdU Alexa Fluor™ 647 Flow Cytometry Assay Kit according to manufacturer's  
 17 protocol (Thermo Fisher).

#### 19 Immunohistochemistry on wholemount retinae

20 Fish were euthanised using 20x Tricaine and fixed overnight in 4 % PFA in 1x PTW at 4°C.  
 21 After fixation, samples were washed with 1x PTW. Fish were bleached with 3 % H<sub>2</sub>O<sub>2</sub>, 0.5 %  
 22 KOH in 1x PTW for 2-3 h in the dark. Retinae were enucleated and permeabilised with acetone  
 23 for 15 min at -20°C. Blocking was performed in 1 % bovine serum albumin (Sigma- Aldrich),  
 24 1 % DMSO (Roth/Merck), 4 % sheep serum (Sigma-Aldrich) in 1x PTW for 2 h. Samples were  
 25 incubated with primary antibody in blocking buffer overnight at 4°C. The secondary antibody  
 26 was applied together with DAPI in blocking buffer overnight at 4°C. Primary antibodies were  
 27 used at 1:200, secondary antibodies at 1:250 and DAPI at 1:500.

#### 29 Antibodies

| Primary Antibody | Species | Concentration | Company                   |
|------------------|---------|---------------|---------------------------|
| anti-BrdU        | rat     | 1:200         | Abcam, ab6326             |
| anti-DsRed       | rabbit  | 1:500         | Clontech, 632496          |
| anti-eGFP        | chicken | 1:500         | Life Technologies, A10262 |
| anti-pAkt        | rabbit  | 1:200         | Cell Signaling, 4060      |
| anti-PcnA        | mouse   | 1:100         | Millipore, CBL407         |
| anti-pIgflr      | rabbit  | 1:100         | Abcam, ab39398            |
| anti-Rx2         | rabbit  | 1:500         | (Reinhardt et al., 2015)  |

  

| Secondary Antibody | Species | Concentration | Company |
|--------------------|---------|---------------|---------|
|--------------------|---------|---------------|---------|

---

|                              |        |       |                            |
|------------------------------|--------|-------|----------------------------|
| anti-chicken Alexa Fluor 488 | donkey | 1:750 | Jackson, 703-485-155       |
| anti-mouse Alexa 546         | goat   | 1:750 | Life Technologies, A-11030 |
| anti-rabbit Alexa Fluor 488  | goat   | 1:750 | Life Technologies, A-11034 |
| anti-rabbit DyLight549       | goat   | 1:750 | Jackson, 112-505-144       |
| anti-rabbit Alexa Fluor 647  | goat   | 1:750 | Life Technologies, A-21245 |
| anti-rat DyLight488          | goat   | 1:750 | Jackson, 112-485-143       |

---

1

## 2 Measurement of cell cycle and S phase length

3 To determine cell cycle length of retinal progenitor cells, BrdU and EdU were used as  
4 previously described (Das et al., 2009). Hatchlings were incubated for 2 h in BrdU, then 30  
5 min in EdU before fixation. PcnA antibody staining was used to label all cycling retinal  
6 progenitor cells. PcnA-, EdU- and BrdU-positive cells as well as cells positive for only BrdU  
7 were quantified. Cell cycle length and S phase length were determined:  $T_{\text{cell cycle}} = 2 \text{ h} * (\text{PcnA}^+$   
8  $\text{cells}/\text{BrdU}^+ \text{ only cells})$ ;  $T_{\text{S phase}} = 2 \text{ h} * (\text{EdU}^+ \text{ cells}/\text{BrdU}^+ \text{ only cells})$ . Four retinæ from  
9 individual hatchlings were used for analysis. Cell counts were performed in  $z = 6 \mu\text{m}$  of two  
10 to three central sections per retina.  $T_{\text{cell cycle}}$  and  $T_{\text{S phase}}$  were determined for individual sections.

11

## 12 Wholemout *in situ* hybridisation

13 Wholemout *in situ* hybridisations using NBT/BCIP detection were carried out as previously  
14 described (Loosli, Köster, Carl, Krone, & Wittbrodt, 1998). Afterwards, samples were  
15 cryoprotected in 30 % sucrose in 1x PTW overnight at 4°C and 20  $\mu\text{m}$  thick serial sections  
16 were obtained on a Leica cryostat. Sections were rehydrated in 1x PTW for 30 min at room  
17 temperature and washed several times with 1x PTW. Slides were mounted with 60 % glycerol  
18 and kept at 4°C until imaging.

19

## 20 Image acquisition

21 All immunohistochemistry images were acquired by confocal microscopy at a Leica TCS SP8  
22 with 20x or 63x glycerol objective. Sections of wholemout *in situ* hybridisations were imaged  
23 at a Zeiss Axio Imager M1 microscope. Images of whole hatchlings were acquired with a Nikon  
24 SMZ18 Stereomicroscope equipped with the camera Nikon DS-Ri1.

25

## 26 Image processing and statistical analysis

27 Images were processed via Fiji image processing software. Statistical analysis and graphical  
28 representation of the data were performed using the Prism software package (GraphPad).  
29 Violin plots show median, 25th and 75th percentiles. Unpaired two-tailed t-tests were  
30 performed to determine the statistical significances. The P value  $P < 0.05$  was considered  
31 significant and P values are given in the figure legends. Sample size (n) is mentioned in every  
32 figure legend. No statistical methods were used to predetermine sample sizes, but our sample  
33 sizes are similar to those generally used in the field. The experimental groups were allocated  
34 randomly, and no blinding was done during allocation.

35

## 36 **Acknowledgements**

37 We thank the Wittbrodt lab for constructive discussions on the project, Alex Cornean, Steffen  
38 Lemke, Tinatini Tavhelidse, Erika Tsingos, Venera Weinhardt and Lucie Zilova for critical

1 reading of the manuscript. We are grateful to A. Saraceno, E. Leist and M. Majewski for fish  
2 husbandry. C.B. and K.L. were members of HBIGS, the Heidelberg Graduate School for Life  
3 Sciences. C.B. was supported by a PhD fellowship of the Studienstiftung des deutschen Volkes.  
4 This work was supported by the European Research Council (GA 294354-ManISteC to J.W.)  
5 and the Deutsche Forschungsgemeinschaft (SFB 873 TP A3 to J.W.).

### 7 **Author Contributions**

8 C.B., K.L. and J.W. conceived the study and designed the experiments. C.B. performed the  
9 experiments. C.B., K.L. and J.W. wrote the manuscript.

### 11 **Competing interests**

12 Authors declare no competing interests.

### 14 **Data and materials availability**

15 All data are available in the main text or the supplementary materials.

### 17 **References**

- 19 Aghaallaei, N., Gruhl, F., Schaefer, C. Q., Wernet, T., Weinhardt, V., Centanin, L., et al.  
20 (2016). Identification, visualization and clonal analysis of intestinal stem cells in fish.  
21 *Development*, 143(19), 3470–3480. <http://doi.org/10.1242/dev.134098>
- 22 Andersen, D. S., Colombani, J., & Léopold, P. (2013). Coordination of organ growth:  
23 principles and outstanding questions from the world of insects. *Trends in Cell Biology*,  
24 23(7), 336–344. <http://doi.org/10.1016/j.tcb.2013.03.005>
- 25 Ayaso, E., Nolan, C. M., & Byrnes, L. (2002). Zebrafish insulin-like growth factor-I receptor:  
26 molecular cloning and developmental expression. *Molecular and Cellular*  
27 *Endocrinology*, 191(2), 137–148. [http://doi.org/10.1016/S0303-7207\(02\)00083-7](http://doi.org/10.1016/S0303-7207(02)00083-7)
- 28 Baker, J., Liu, J. P., Robertson, E. J., & Efstratiadis, A. (1993). Role of insulin-like growth  
29 factors in embryonic and postnatal growth. *Cell*, 75(1), 73–82.
- 30 Bibliowicz, J., & Gross, J. M. (2009). Expanded progenitor populations, vitreo-retinal  
31 abnormalities, and Müller glial reactivity in the zebrafish leprechaun/patched2 retina.  
32 *BMC Developmental Biology*, 9(1), 1139–14. <http://doi.org/10.1186/1471-213X-9-52>
- 33 Bosch, P. S., Ziukaite, R., Alexandre, C., Basler, K., & Vincent, J.-P. (2017). Dpp controls  
34 growth and patterning in Drosophila wing precursors through distinct modes of action.  
35 *eLife*, 6. <http://doi.org/10.7554/eLife.22546>
- 36 Boucher, S. E., & Hitchcock, P. F. (1998). Insulin-like growth factor-I binds in the inner  
37 plexiform layer and circumferential germinal zone in the retina of the goldfish. *The*  
38 *Journal of Comparative Neurology*, 394(3), 395–401. [http://doi.org/10.1002/\(sici\)1096-9861\(19980511\)394:3<395::aid-cne10>3.0.co;2-o](http://doi.org/10.1002/(sici)1096-9861(19980511)394:3<395::aid-cne10>3.0.co;2-o)
- 40 Boulan, L., Milán, M., & Léopold, P. (2015). The Systemic Control of Growth. *Cold Spring*  
41 *Harbor Perspectives in Biology*, 7(12), a019117.  
42 <http://doi.org/10.1101/cshperspect.a019117>
- 43 Cabochette, P., Vega-Lopez, G., Bitard, J., Parain, K., Chemouny, R., Masson, C., et al.  
44 (2015). YAP controls retinal stem cell DNA replication timing and genomic stability.  
45 *eLife*, 4, e08488. <http://doi.org/10.7554/eLife.08488>
- 46 Carboni, J. M., Lee, A. V., Hadsell, D. L., Rowley, B. R., Lee, F. Y., Bol, D. K., et al. (2005).  
47 Tumor development by transgenic expression of a constitutively active insulin-like  
48 growth factor I receptor. *Cancer Research*, 65(9), 3781–3787.  
49 <http://doi.org/10.1158/0008-5472.CAN-04-4602>
- 50 Caves, E. M., Sutton, T. T., & Johnsen, S. (2017). Visual acuity in ray-finned fishes

- 1 correlates with eye size and habitat. *Journal of Experimental Biology*, 220(9), 1586–  
2 1596. <http://doi.org/10.1242/jeb.151183>
- 3 Centanin, L., Ander, J. J., Hoeckendorf, B., Lust, K., Kellner, T., Kraemer, I., et al. (2014).  
4 Exclusive multipotency and preferential asymmetric divisions in post-embryonic neural  
5 stem cells of the fish retina. *Development*, 141(18), 3472–3482.  
6 <http://doi.org/10.1242/dev.109892>
- 7 Chablais, F., & Jazwinska, A. (2010). IGF signaling between blastema and wound epidermis  
8 is required for fin regeneration. *Development*, 137(6), 871–879.  
9 <http://doi.org/10.1242/dev.043885>
- 10 Choi, W.-Y., Gemberling, M., Wang, J., Holdway, J. E., Shen, M.-C., Karlstrom, R. O., &  
11 Poss, K. D. (2013). In vivo monitoring of cardiomyocyte proliferation to identify  
12 chemical modifiers of heart regeneration. *Development*, 140(3), 660–666.  
13 <http://doi.org/10.1242/dev.088526>
- 14 Colombani, J., Andersen, D. S., & Léopold, P. (2012). Secreted peptide Dilp8 coordinates  
15 *Drosophila* tissue growth with developmental timing. *Science (New York, N.Y.)*,  
16 336(6081), 582–585. <http://doi.org/10.1126/science.1216689>
- 17 Darwish, S. T., Mohalal, M. E., Helal, M. M., & El-Sayyad, H. I. H. (2015). Structural and  
18 functional analysis of ocular regions of five marine teleost fishes (*Hippocampus*  
19 *hippocampus*, *Sardina pilchardus*, *Gobius niger*, *Mullus barbatus* & *Solea solea*).  
20 *Egyptian Journal of Basic and Applied Sciences*, 2(3), 159–166.  
21 <http://doi.org/http://dx.doi.org/10.1016/j.ejbas.2015.04.004>
- 22 Das, G., Choi, Y., Sicinski, P., & Levine, E. M. (2009). Cyclin D1 fine-tunes the neurogenic  
23 output of embryonic retinal progenitor cells. *Neural Development*, 4(1), 1–23.  
24 [http://doi.org/10.1016/S0190-9622\(89\)80292-0](http://doi.org/10.1016/S0190-9622(89)80292-0)
- 25 de Busserolles, F., Fitzpatrick, J. L., Marshall, N. J., & Collin, S. P. (2014). The influence of  
26 photoreceptor size and distribution on optical sensitivity in the eyes of lanternfishes  
27 (Myctophidae). *PLoS ONE*, 9(6), e99957. <http://doi.org/10.1371/journal.pone.0099957>
- 28 Eivers, E., McCarthy, K., Glynn, C., Nolan, C. M., & Byrnes, L. (2004). Insulin-like growth  
29 factor (IGF) signalling is required for early dorso-anterior development of the zebrafish  
30 embryo. *The International Journal of Developmental Biology*, 48, 1131–1140.  
31 <http://doi.org/10.1387/ijdb.041913ee>
- 32 Fischer, A. J., & Reh, T. A. (2000). Identification of a proliferating marginal zone of retinal  
33 progenitors in postnatal chickens. *Developmental Biology*, 220(2), 197–210.  
34 <http://doi.org/10.1006/dbio.2000.9640>
- 35 Furlan, G., Cuccioli, V., Vuillemin, N., Dirian, L., Muntasell, A. J., Coolen, M., et al. (2017).  
36 Life-Long Neurogenic Activity of Individual Neural Stem Cells and Continuous Growth  
37 Establish an Outside-In Architecture in the Teleost Pallium. *Current Biology : CB*,  
38 27(21), 3288–3301.e3. <http://doi.org/10.1016/j.cub.2017.09.052>
- 39 Gil-Perotin, S., Marin-Husstege, M., Li, J., Soriano-Navarro, M., Zindy, F., Roussel, M. F., et  
40 al. (2006). Loss of p53 induces changes in the behavior of subventricular zone cells:  
41 implication for the genesis of glial tumors. *The Journal of Neuroscience*, 26(4), 1107–  
42 1116. <http://doi.org/10.1523/JNEUROSCI.3970-05.2006>
- 43 Hodge, R. D., D'Ercole, A. J., & O'Kusky, J. R. (2004). Insulin-like growth factor-I  
44 accelerates the cell cycle by decreasing G1 phase length and increases cell cycle reentry  
45 in the embryonic cerebral cortex. *The Journal of Neuroscience*, 24(45), 10201–10210.  
46 <http://doi.org/10.1523/JNEUROSCI.3246-04.2004>
- 47 Hollyfield, J. G. (1971). Differential growth of the neural retina in *Xenopus laevis* larvae.  
48 *Developmental Biology*, 24(2), 264–286. [http://doi.org/10.1016/0012-1606\(71\)90098-4](http://doi.org/10.1016/0012-1606(71)90098-4)
- 49 Huang, Y., Harrison, M. R., Osorio, A., Kim, J., Baugh, A., Duan, C., et al. (2013). Igf  
50 Signaling is Required for Cardiomyocyte Proliferation during Zebrafish Heart

- 1 Development and Regeneration. *PLoS ONE*, 8(6), e67266.  
2 <http://doi.org/10.1371/journal.pone.0067266>
- 3 Johns, P. R., & Easter, S. S. (1977). Growth of the adult goldfish eye. II. Increase in retinal  
4 cell number. *The Journal of Comparative Neurology*, 176(3), 331–341.  
5 <http://doi.org/10.1002/cne.901760303>
- 6 Klammt, J., Pfäffle, R., Werner, H., & Kiess, W. (2008). IGF signaling defects as causes of  
7 growth failure and IUGR. *Trends in Endocrinology and Metabolism: TEM*, 19(6), 197–  
8 205. <http://doi.org/10.1016/j.tem.2008.03.003>
- 9 Klimova, L., & Kozmik, Z. (2014). Stage-dependent requirement of neuroretinal Pax6 for  
10 lens and retina development. *Development*, 141(6), 1292–1302.  
11 <http://doi.org/10.1242/dev.098822>
- 12 Kubota, R., Hokoc, J. N., Moshiri, A., McGuire, C., & Reh, T. A. (2002). A comparative  
13 study of neurogenesis in the retinal ciliary marginal zone of homeothermic vertebrates.  
14 *Developmental Brain Research*, 134(1-2), 31–41. [http://doi.org/10.1016/S0165-](http://doi.org/10.1016/S0165-3806(01)00287-5)  
15 [3806\(01\)00287-5](http://doi.org/10.1016/S0165-3806(01)00287-5)
- 16 Liu, J. P., Baker, J., Perkins, A. S., Robertson, E. J., & Efstratiadis, A. (1993). Mice carrying  
17 null mutations of the genes encoding insulin-like growth factor I (Igf-1) and type 1 IGF  
18 receptor (Igf1r). *Cell*, 75(1), 59–72.
- 19 Loosli, F., Köster, R. W., Carl, M., Krone, A., & Wittbrodt, J. (1998). Six3, a medaka  
20 homologue of the Drosophila homeobox gene sine oculis is expressed in the anterior  
21 embryonic shield and the developing eye. *Mechanisms of Development*, 74(1-2), 159–  
22 164. [http://doi.org/10.1016/S0925-4773\(98\)00055-0](http://doi.org/10.1016/S0925-4773(98)00055-0)
- 23 Loosli, F., Köster, R. W., Carl, M., Kühnlein, R., Henrich, T., Mücke, M., et al. (2000). A  
24 genetic screen for mutations affecting embryonic development in medaka fish (*Oryzias*  
25 *latipes*). *Mechanisms of Development*, 97(1-2), 133–139. [http://doi.org/10.1016/S0925-](http://doi.org/10.1016/S0925-4773(00)00406-8)  
26 [4773\(00\)00406-8](http://doi.org/10.1016/S0925-4773(00)00406-8)
- 27 Love, N. K., Keshavan, N., Lewis, R., Harris, W. A., & Agathocleous, M. (2014). A nutrient-  
28 sensitive restriction point is active during retinal progenitor cell differentiation.  
29 *Development (Cambridge, England)*, 141(3), 697–706.  
30 <http://doi.org/10.1242/dev.103978>
- 31 Lust, K., & Wittbrodt, J. (2018). Activating the regenerative potential of Müller glia cells in a  
32 regeneration-deficient retina. *eLife*, 7, 7028. <http://doi.org/10.7554/eLife.32319>
- 33 Meletis, K., Wirta, V., Hede, S.-M., Nistér, M., Lundeborg, J., & Frisén, J. (2006). p53  
34 suppresses the self-renewal of adult neural stem cells. *Development*, 133(2), 363–369.  
35 <http://doi.org/10.1242/dev.02208>
- 36 Otteson, D. C., Cirenza, P. F., & Hitchcock, P. F. (2002). Persistent neurogenesis in the  
37 teleost retina: Evidence for regulation by the growth-hormone/insulin-like growth factor-  
38 I axis. *Mechanisms of Development*, 117(1-2), 137–149. [http://doi.org/10.1016/S0925-](http://doi.org/10.1016/S0925-4773(02)00188-0)  
39 [4773\(02\)00188-0](http://doi.org/10.1016/S0925-4773(02)00188-0)
- 40 Perez, L. N., Lorena, J., Costa, C. M., Araujo, M. S., Frota-Lima, G. N., Matos-Rodrigues, G.  
41 E., et al. (2017). Eye development in the four-eyed fish *Anableps anableps*: cranial and  
42 retinal adaptations to simultaneous aerial and aquatic vision. *Proceedings. Biological*  
43 *Sciences*, 284(1852), 20170157. <http://doi.org/10.1098/rspb.2017.0157>
- 44 Pérez Saturnino, A., Lust, K., & Wittbrodt, J. (2018). Notch signalling patterns retinal  
45 composition by regulating *atoh7* during post-embryonic growth. *Development*  
46 *(Cambridge, England)*, 145(21). <http://doi.org/10.1242/dev.169698>
- 47 Radaelli, G., Domeneghini, C., Arrighi, S., Bosi, G., Patrino, M., & Funkenstein, B. (2003a).  
48 Localization of IGF-I, IGF-I receptor, and IGFBP-2 in developing *Umbrina cirrosa*  
49 (Pisces: Osteichthyes). *General and Comparative Endocrinology*, 130(3), 232–244.  
50 [http://doi.org/10.1016/S0016-6480\(02\)00609-3](http://doi.org/10.1016/S0016-6480(02)00609-3)



- 1 Radaelli, G., Patruno, M., Maccatrozzo, L., & Funkenstein, B. (2003b). Expression and  
2 cellular localization of insulin-like growth factor-II protein and mRNA in *Sparus aurata*  
3 during development. *The Journal of Endocrinology*, *178*(2), 285–299.
- 4 Raymond Johns, P. (1977). Growth of the adult goldfish eye. III: Source of the new retinal  
5 cells. *The Journal of Comparative Neurology*, *176*(3), 343–357.  
6 <http://doi.org/10.1002/cne.901760304>
- 7 Raymond, P. A., Barthel, L. K., Bernardos, R. L., & Perkowski, J. J. (2006). Molecular  
8 characterization of retinal stem cells and their niches in adult zebrafish. *BMC*  
9 *Developmental Biology*, *6*(1), 36–53. <http://doi.org/10.1186/1471-213X-6-36>
- 10 Reinhardt, R., Centanin, L., Tavhelidse, T., Inoue, D., Wittbrodt, B., Concordet, J.-P., et al.  
11 (2015). Sox2, Tlx, Gli3, and Her9 converge on Rx2 to define retinal stem cells in vivo.  
12 *The EMBO Journal*, *34*(11), 1572–1588. <http://doi.org/10.15252/embj.201490706>
- 13 Ritchey, E. R., Zelinka, C. P., Tang, J., Liu, J., & Fischer, A. J. (2012). The combination of  
14 IGF1 and FGF2 and the induction of excessive ocular growth and extreme myopia.  
15 *Experimental Eye Research*, *99*, 1–16. <http://doi.org/10.1016/j.exer.2012.03.019>
- 16 Schlueter, P. J., Peng, G., Westerfield, M., & Duan, C. (2007). Insulin-like growth factor  
17 signaling regulates zebrafish embryonic growth and development by promoting cell  
18 survival and cell cycle progression. *Cell Death and Differentiation*, *14*(6), 1095–1105.  
19 <http://doi.org/10.1038/sj.cdd.4402109>
- 20 Shingleton, A. W., & Frankino, W. A. (2018). The (ongoing) problem of relative growth.  
21 *Current Opinion in Insect Science*, *25*, 9–19. <http://doi.org/10.1016/j.cois.2017.10.001>
- 22 Straznicky, K., & Gaze, R. M. (1971). The growth of the retina in *Xenopus laevis*: an  
23 autoradiographic study. *Journal of Embryology and Experimental Morphology*, *26*(1),  
24 67–79.
- 25 Stujenske, J. M., Dowling, J. E., & Emran, F. (2011). The bugeye mutant zebrafish exhibits  
26 visual deficits that arise with the onset of an enlarged eye phenotype. *Investigative*  
27 *Ophthalmology and Visual Science*, *52*(7), 4200–4207. <http://doi.org/10.1167/iovs.10-6434>
- 28
- 29 Sutter, N. B., Bustamante, C. D., Chase, K., Gray, M. M., Zhao, K., Zhu, L., et al. (2007). A  
30 single IGF1 allele is a major determinant of small size in dogs. *Science*, *316*(5821),  
31 112–115. <http://doi.org/10.1126/science.1137045>
- 32 Tang, H. Y., Smith-Caldas, M. S. B., Driscoll, M. V., Salhadar, S., & Shingleton, A. W.  
33 (2011). FOXO regulates organ-specific phenotypic plasticity in *Drosophila*. *PLoS*  
34 *Genetics*, *7*(11), e1002373. <http://doi.org/10.1371/journal.pgen.1002373>
- 35 Thermes, V., Grabher, C., Ristoratore, F., Bourrat, F., Choulika, A., Wittbrodt, J., & Joly, J.-  
36 S. (2002). I-SceI meganuclease mediates highly efficient transgenesis in fish.  
37 *Mechanisms of Development*, *118*(1-2), 91–98. [http://doi.org/10.1016/S0925-4773\(02\)00218-6](http://doi.org/10.1016/S0925-4773(02)00218-6)
- 38
- 39 Tsingos, E., Höckendorf, B., Sütterlin, T., Kirchmaier, S., Grabe, N., Centanin, L., &  
40 Wittbrodt, J. (2019). Retinal stem cells modulate proliferative parameters to coordinate  
41 post-embryonic morphogenesis in the eye of fish. *eLife*, *8*, 3470.  
42 <http://doi.org/10.7554/eLife.42646>
- 43 Twitty, V. C., & Schwind, J. L. (1931). The growth of eyes and limbs transplanted  
44 heteroplastically between two species of *Amblystoma*. *Journal of Experimental Zoology*,  
45 *59*(1), 61–86. <http://doi.org/10.1002/jez.1400590105>
- 46 Veth, K. N., Willer, J. R., Collery, R. F., Gray, M. P., Willer, G. B., Wagner, D. S., et al.  
47 (2011). Mutations in zebrafish *Lrp2* result in adult-onset ocular pathogenesis that models  
48 myopia and other risk factors for glaucoma. *PLoS Genetics*, *7*(2).  
49 <http://doi.org/10.1371/journal.pgen.1001310>
- 50 Wagner, H. J., Fröhlich, E., Negishi, K., & Collin, S. P. (1998). The eyes of deep-sea fish. II:

- 1        Functional morphology of the retina. *Progress in Retinal and Eye Research*, 17(4), 637–  
2        685. [http://doi.org/10.1016/S1350-9462\(98\)00003-2](http://doi.org/10.1016/S1350-9462(98)00003-2)
- 3        Wan, Y., Almeida, A. D., Rulands, S., Chalour, N., Muresan, L., Wu, Y., et al. (2016). The  
4        ciliary marginal zone of the zebrafish retina: clonal and time-lapse analysis of a  
5        continuously growing tissue. *Development (Cambridge, England)*, 143(7), 1099–1107.  
6        <http://doi.org/10.1242/dev.133314>
- 7        Wang, S., Wang, X., Wu, Y., & Han, C. (2015). IGF-1R Signaling Is Essential for the  
8        Proliferation of Cultured Mouse Spermatogonial Stem Cells by Promoting the G2/M  
9        Progression of the Cell Cycle. *Stem Cells and Development*, 24(4), 471–483.  
10       <http://doi.org/10.1089/scd.2014.0376>
- 11       Zygar, C. A., Colbert, S., Yang, D., & Fernald, R. D. (2005). IGF-1 produced by cone  
12       photoreceptors regulates rod progenitor proliferation in the teleost retina. *Developmental*  
13       *Brain Research*, 154(1), 91–100. <http://doi.org/10.1016/j.devbrainres.2004.10.009>
- 14

## 1 Supplementary Figures

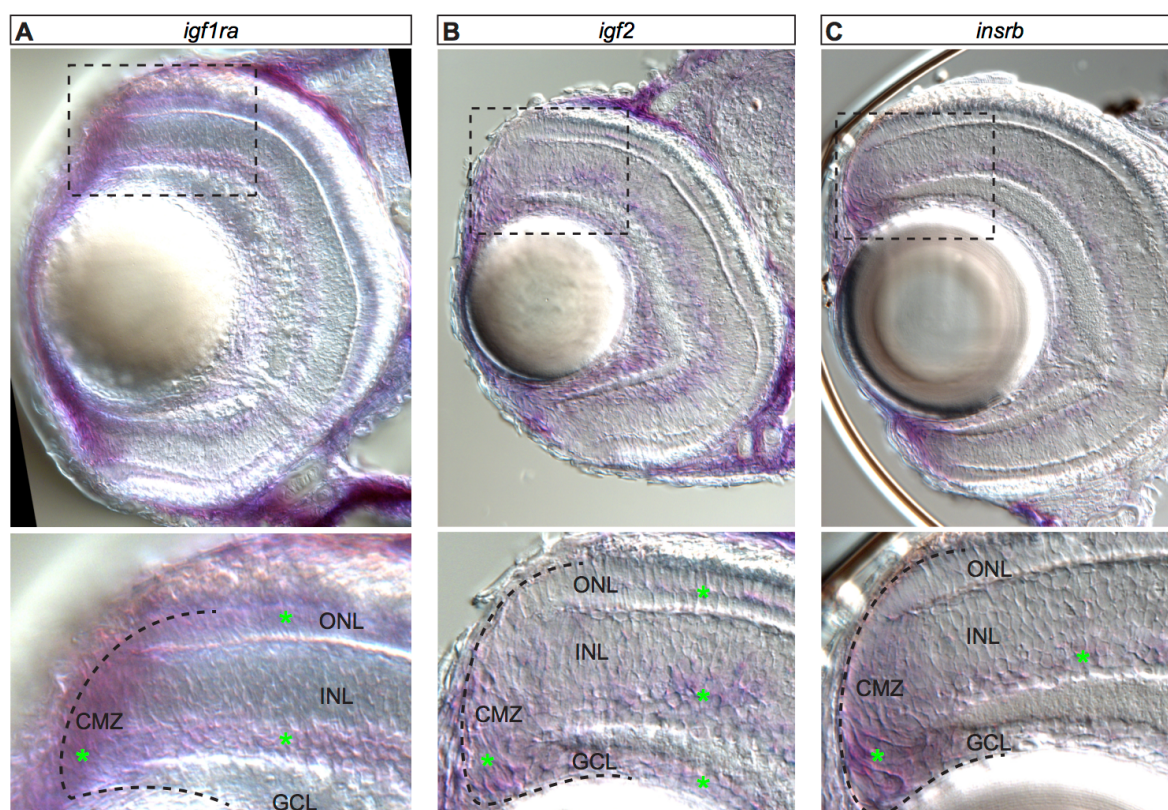

2  
3 **Fig. S1: Igf signalling pathway components are expressed in the hatchling CMZ.** (A-C) Cryosections  
4 of whole-mount *in situ* hybridisations of hatchling retinæ. Expression of *igf1ra* (A) is visible in CMZ, outer  
5 nuclear layer (ONL) and INL (asterisks). *Igf2* (B) is expressed in CMZ, ONL, INL and ganglion cell layer  
6 (GCL). CMZ and INL show expression of *insrb* (C).  
7  
8

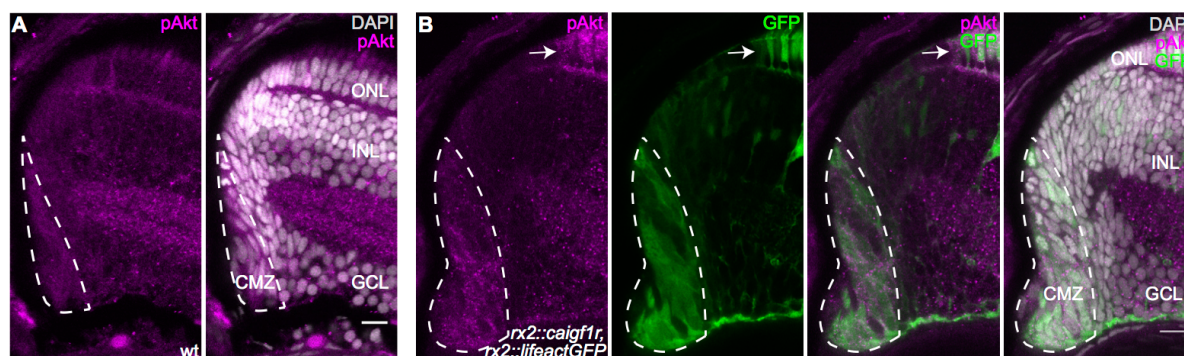

9  
10 **Fig. S2: *Caigf1r* expression results in increased downstream signalling activation in the CMZ.** (A-B)  
11 Cryosections of wt (A) and *rx2::caigf1r* (B) retinæ at hatching stage. The pAkt-positive domain (magenta,  
12 dashed lines) is enlarged in *rx2::caigf1r* (B) compared to wt (A) retinæ, co-localising with GFP signal  
13 (green) also in photoreceptors (B, arrow) (n = 3 fish each). Scale bars are 10  $\mu$ m.



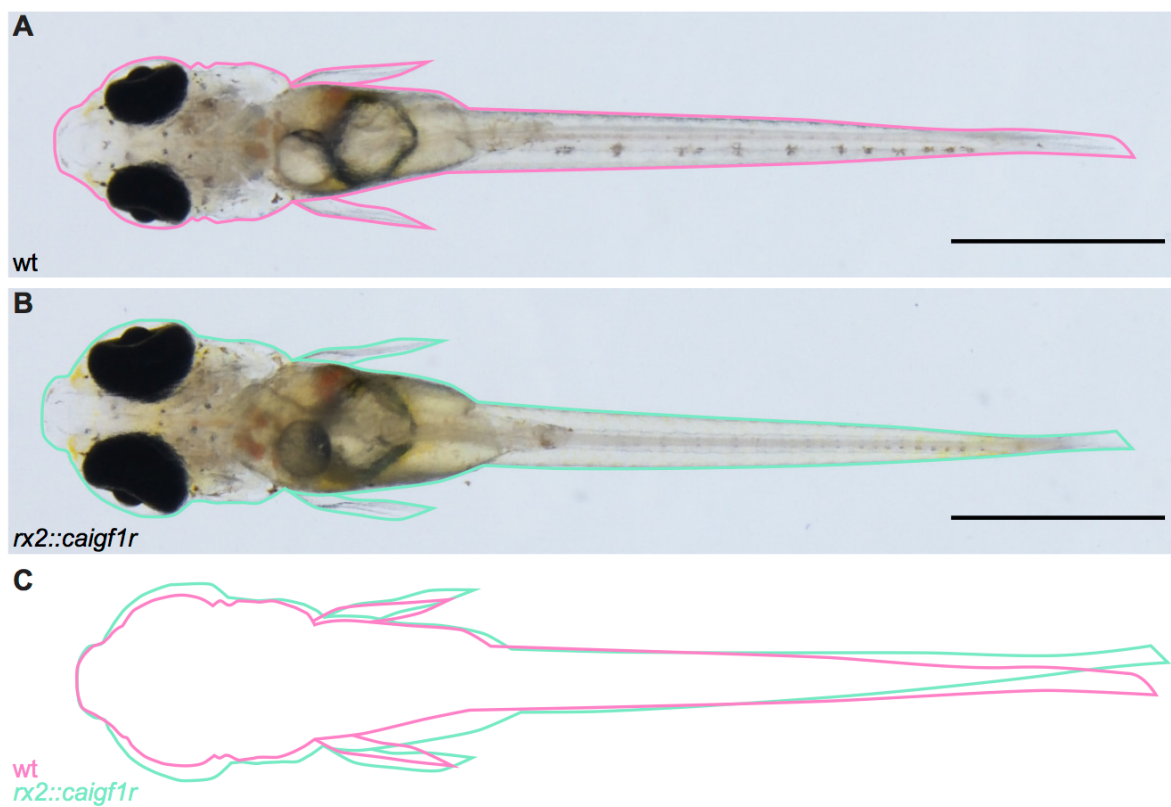

1  
2  
3  
4

**Fig. S3: *Rx2::caigf1r* hatchlings are of comparable size to wt hatchlings.** (A-B) Body size of *rx2::caigf1r* hatchling (B) is similar compared to wt sibling (A). (C) Overlay of body outlines of wt (A) and *rx2::caigf1r* hatchlings (B). Scale bars are 1 mm.

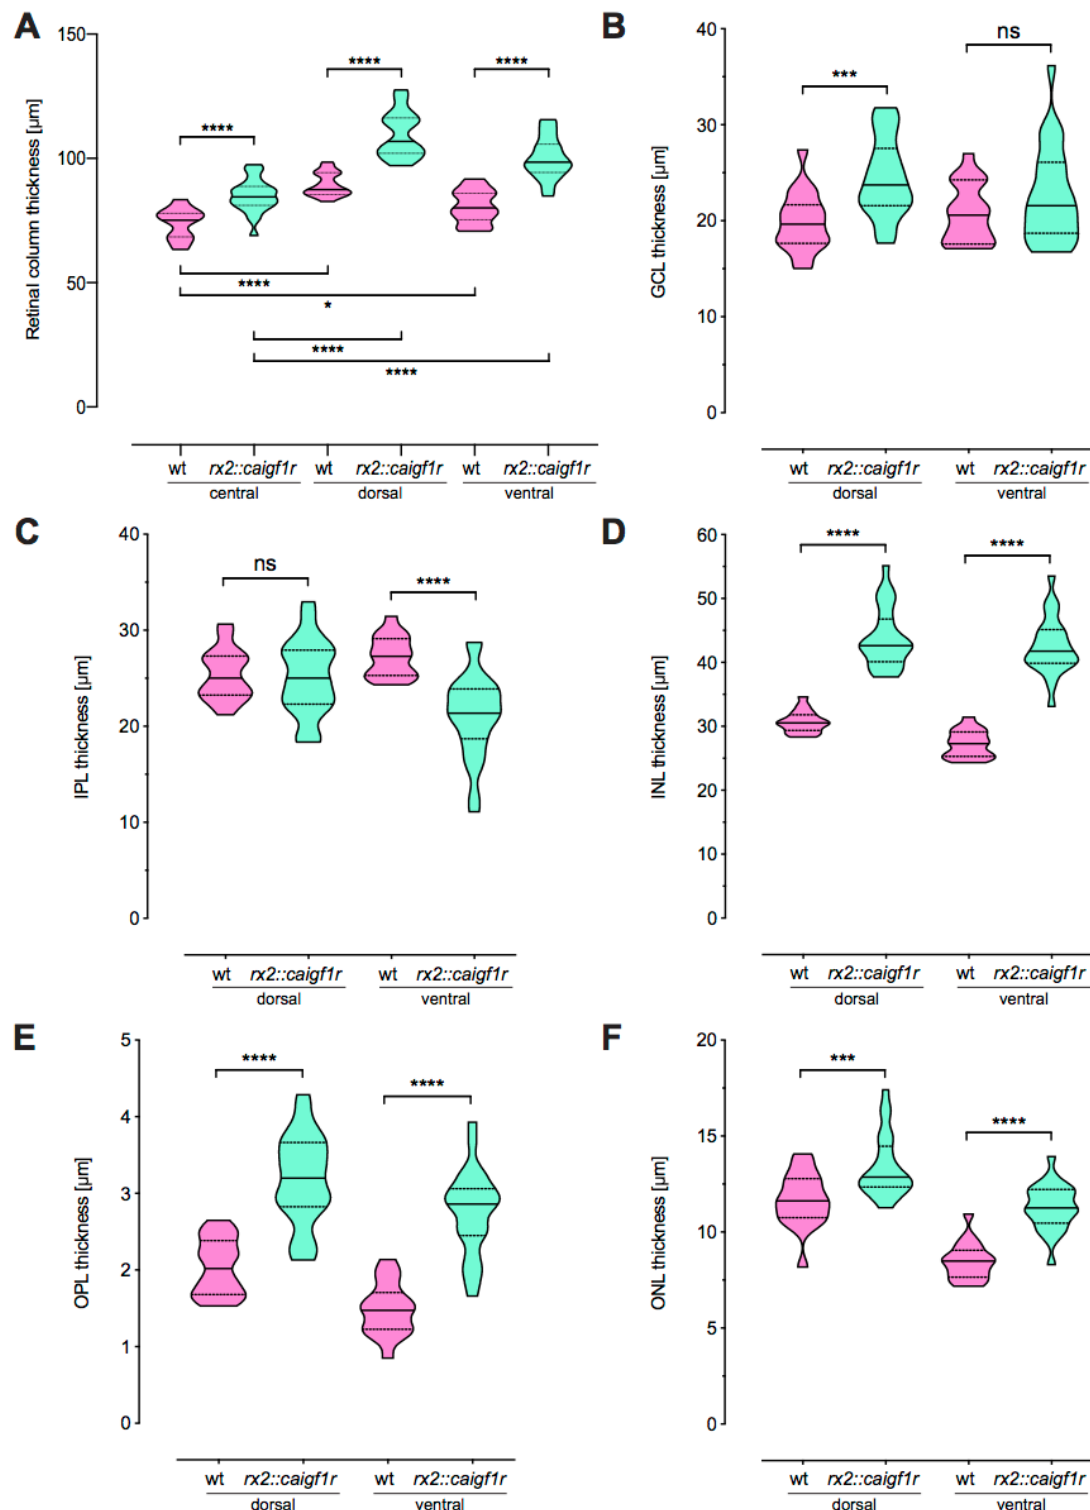

1  
2 **Fig. S4: Neuroretinal thickness is increased throughout all nuclear layers.** (A) Quantification of retinal  
3 column thickness in the central (*wt*: n = 11 sections from 8 retinae, *rx2::caigf1r*: n = 23 sections from 10  
4 retinae), dorsal and ventral (*wt*: n = 18 sections from 12 retinae, *rx2::caigf1r*: n = 24 sections from 14 retinae)  
5 retina shows increase in *rx2::caigf1r* compared to *wt* fish and embryonic to CMZ-derived retina (median +  
6 quartiles, \*\*\*\* $P < 0.0001$ , \* $P_{\text{wt c-v}} = 0.0130$ ). (B-F) Quantification of dorsal and ventral individual retinal  
7 layer thickness in *rx2::caigf1r* (n = 24 sections from 14 retinae) compared to *wt* (n = 18 sections from 12  
8 retinae) retinae (median + quartiles). Expansion of GCL in (B) (\*\* $P_{\text{d}} = 0.0046$ ,  $^{\text{ns}}P_{\text{v}} = 0.1744$ ), INL in (D)  
9 (\*\*\*\* $P_{\text{d/v}} < 0.0001$ ), OPL in (E) (\*\*\* $P_{\text{d}} = 0.0002$ , \*\*\*\* $P_{\text{v}} < 0.0001$ ) and ONL in (F) (\* $P_{\text{d}} = 0.0427$ , \*\*\*\* $P_{\text{v}}$   
10  $< 0.0001$ ), but not IPL in (C) ( $^{\text{ns}}P_{\text{d}} = 0.7863$ , \*\*\*\* $P_{\text{v}} < 0.0001$ ) is evident.



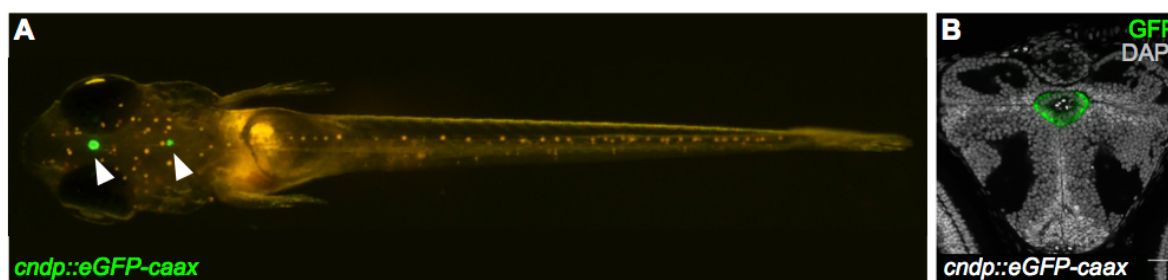

1  
2 **Fig. S5: *Cndp* is expressed in the choroid plexi.** (A) *Cndp::eGFP-caax* hatchling shows GFP expression  
3 in the choroid plexi in the brain (arrowheads). (C) Cryosection of a *cndp::eGFP-caax* hatchling brain. The  
4 diencephalic choroid plexus is positive for GFP (green). Scale bar is 20  $\mu$ m.  
5  
6

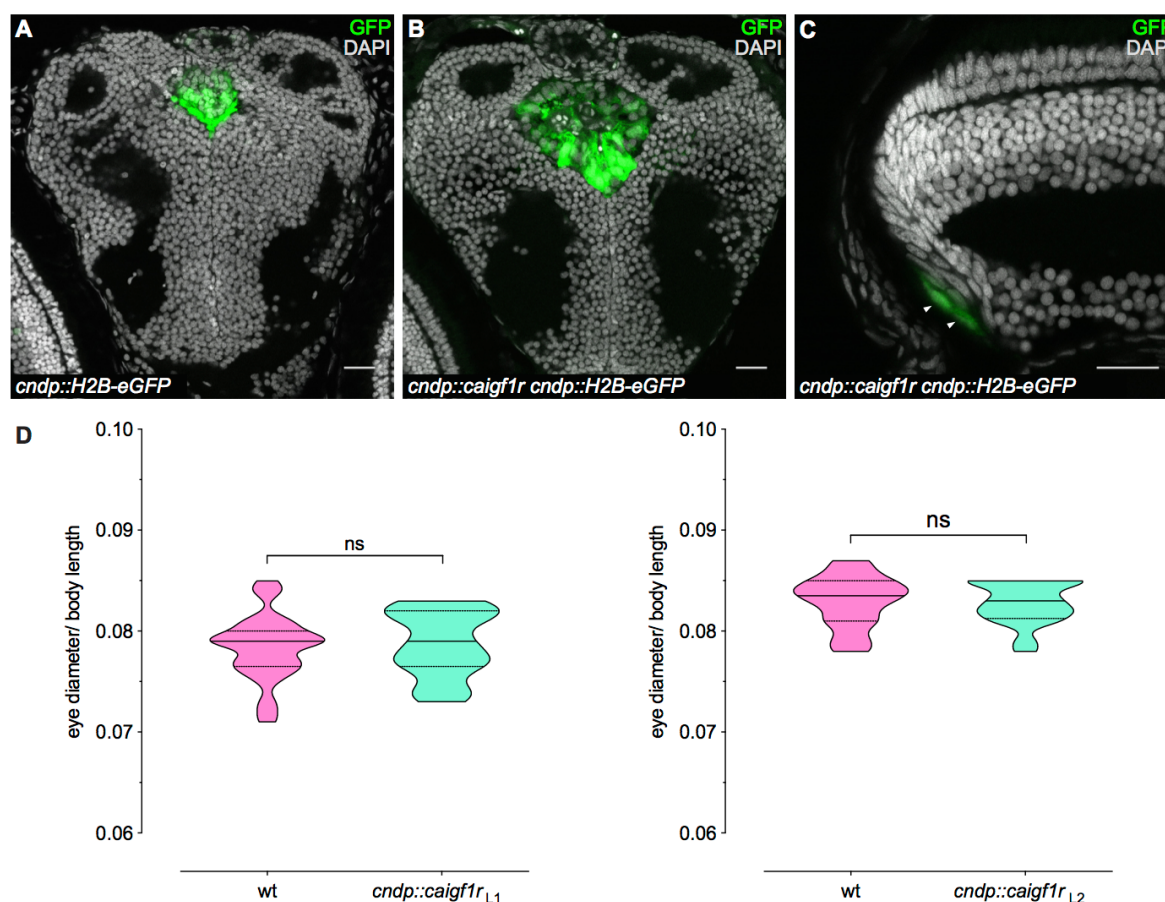

7  
8 **Fig. S6: Expression of *caigf1r* in retinal stem cells does not result in increased eye size.** (A-C)  
9 Cryosections of wt (A) and *cndp::caigf1r* (B-C) *cndp::H2B-eGFP* reporter hatchlings. The choroid plexi  
10 are positive for nuclear GFP (green) and enlarged in *cndp::caigf1r* (B) compared to wt (A) brains. *Cndp*-  
11 driven GFP expression (green, arrowheads) in the CMZ of *cndp::caigf1r* hatchlings (C) is not expanded (n  
12 = 3 fish). Scale bars are 20  $\mu$ m. (D) Quantification of relative eye size (eye diameter normalised to body  
13 length) of wt (Line1: n = 29; Line2: n = 28) and *cndp::caigf1r* (L1: n = 17; L2: n = 20) hatchlings derived  
14 from two different founders (median + quartiles, <sup>ns</sup>P<sub>L1</sub> = 0.7457, <sup>ns</sup>P<sub>L2</sub> = 0.7590).
